# Supplementary material for: Genome-wide association study of paliperidone efficacy
Source: PubMed Central journal article supplement — Pharmacogenet Genomics. 2016 Nov 11;27(1):7–18. doi: 10.1097/FPC.0000000000000250 (PMC5152628; doi:10.1097/fpc.0000000000000250), 2016-11-11

**Supplemental Digital Content Figure 2. QQ plots for GLM GWAS meta-analyses** based on association statistics of all imputed markers (a) Marder positive factor score, (b) Marder negative factor score, (c) total PANSS score, (d) CGI-S; **and for GLM individual cohorts** based on association statistics of all imputed markers (e) Marder positive factor score for cohort 1, (f) Marder positive factor score for cohort 2, (g) Marder positive factor score for cohort 3, (h) Marder negative factor score for cohort 1, (i) Marder negative factor score for cohort 2, (j) Marder negative factor score for cohort 3, (k) total PANSS score for cohort 1, (l) total PANSS score for cohort 2, (m) total PANSS score for cohort 3, (n) CGI-S for cohort 1, (o) CGI-S for cohort 2, and (p) CGI-S for cohort 3.

(a)

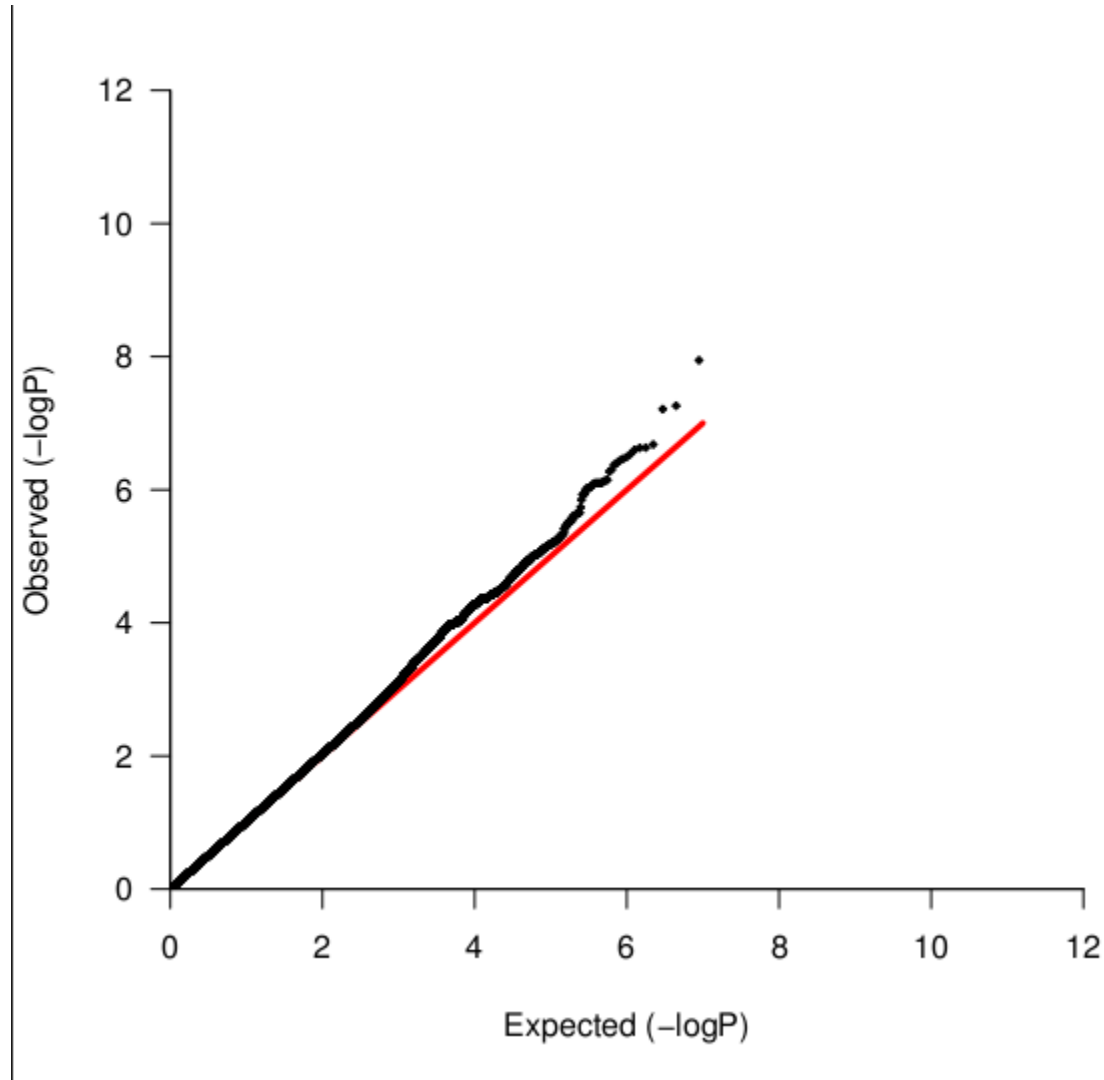

(b)

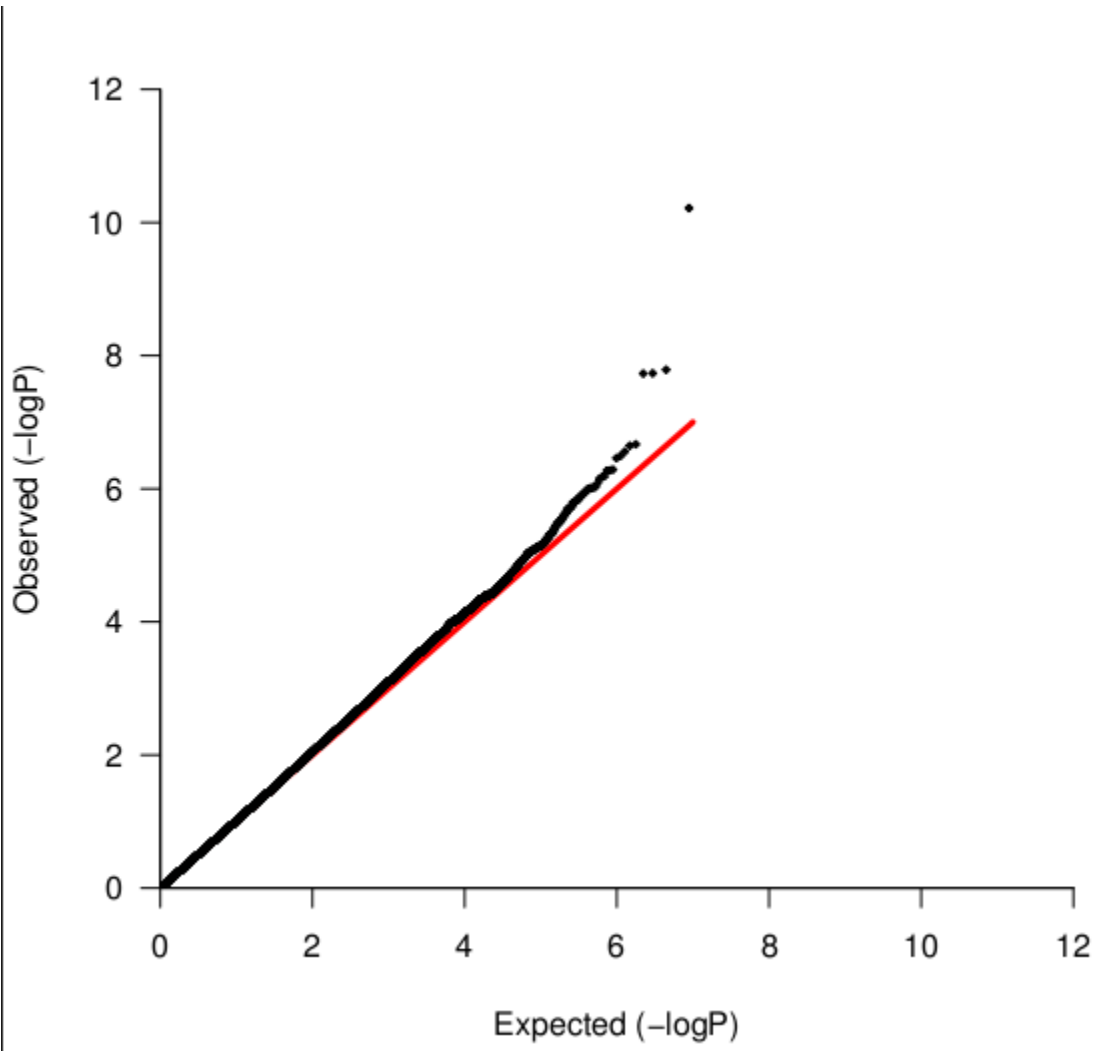

(c)

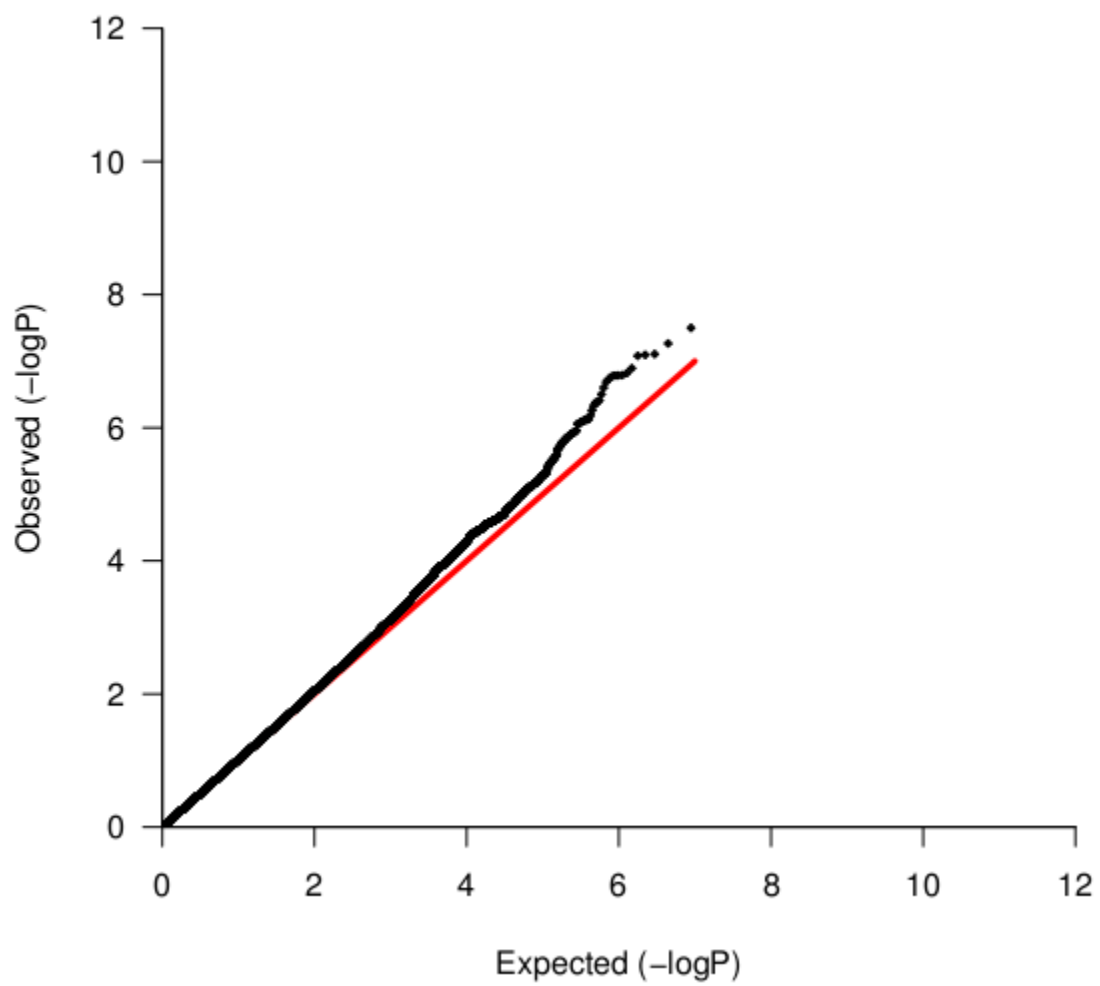

(d)

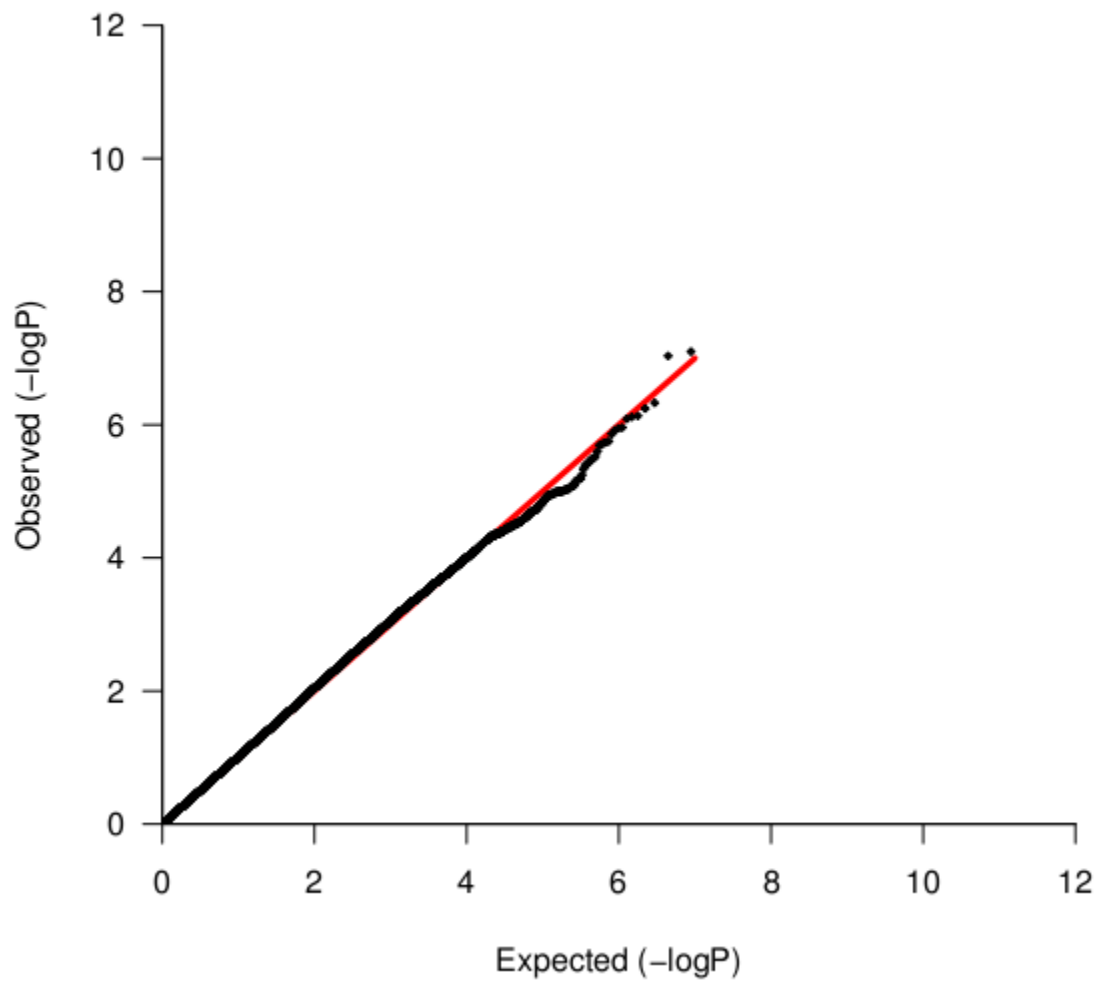

(e)

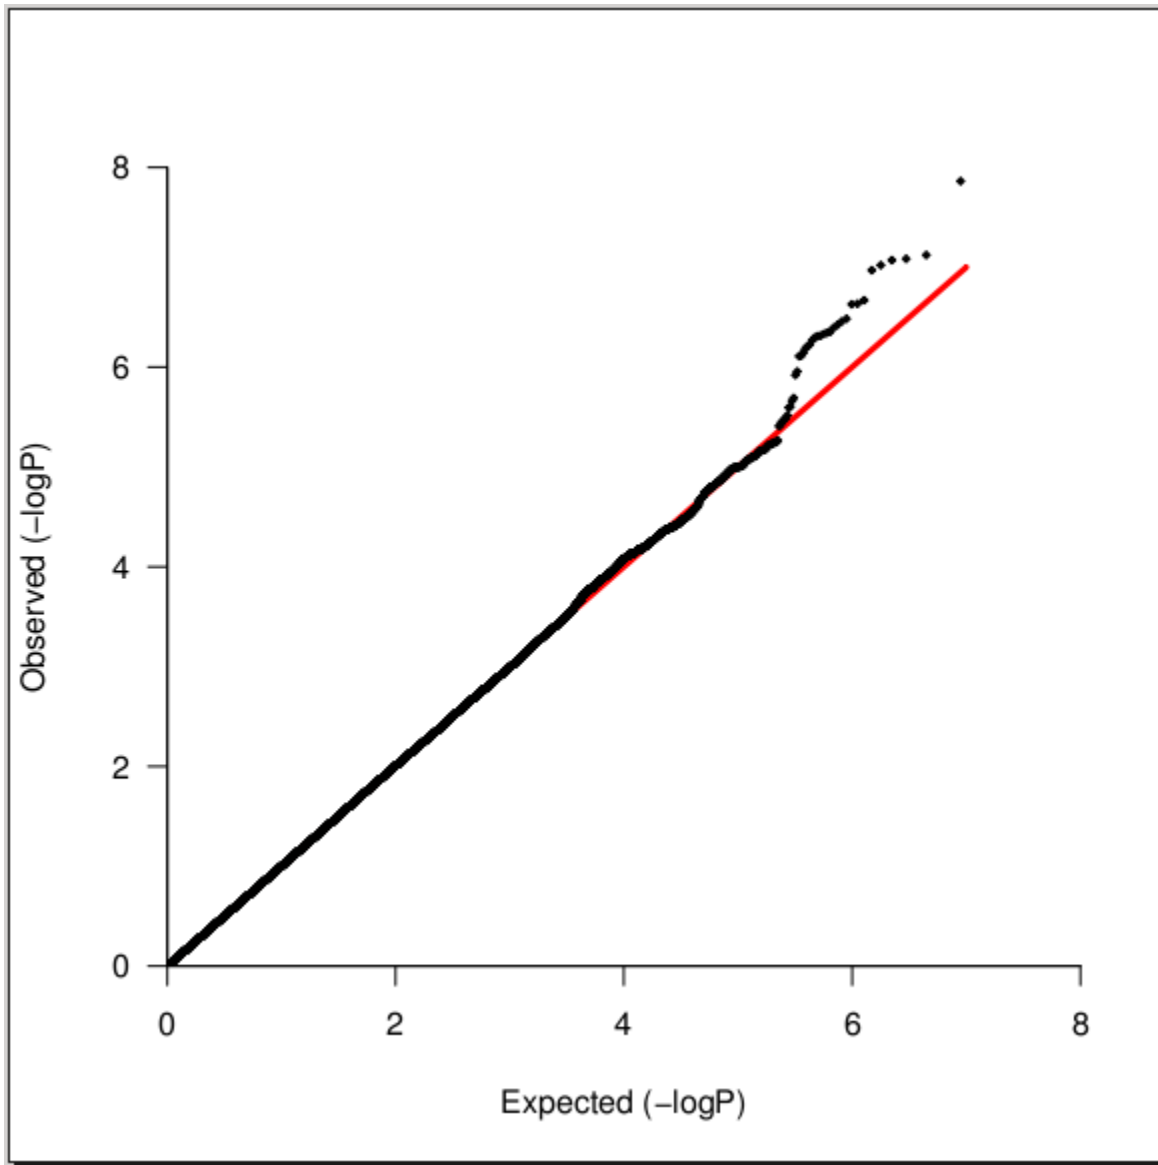

(f)

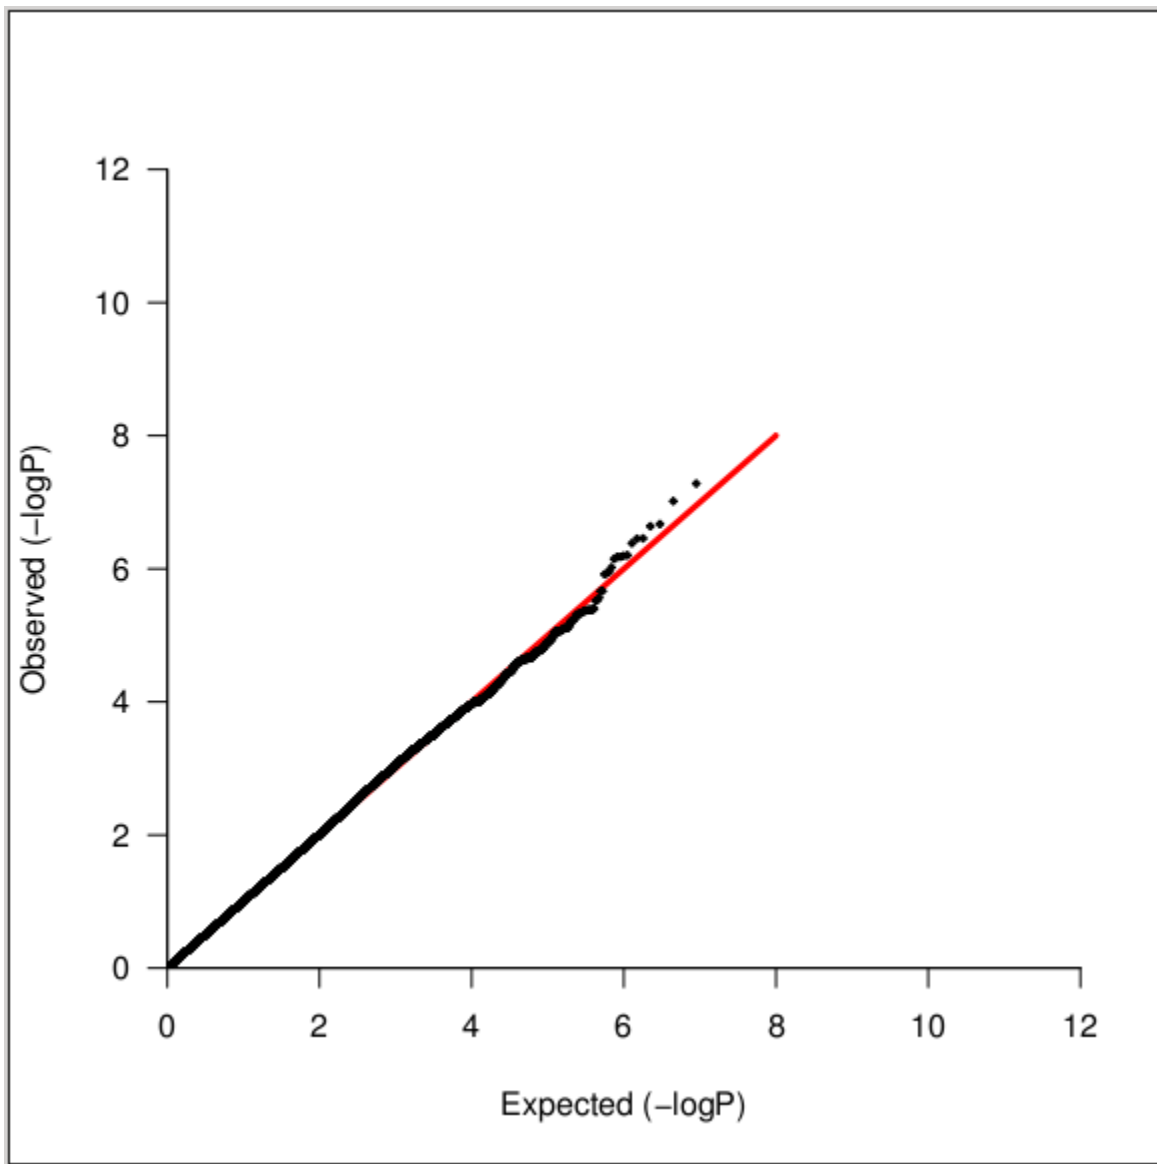

(g)

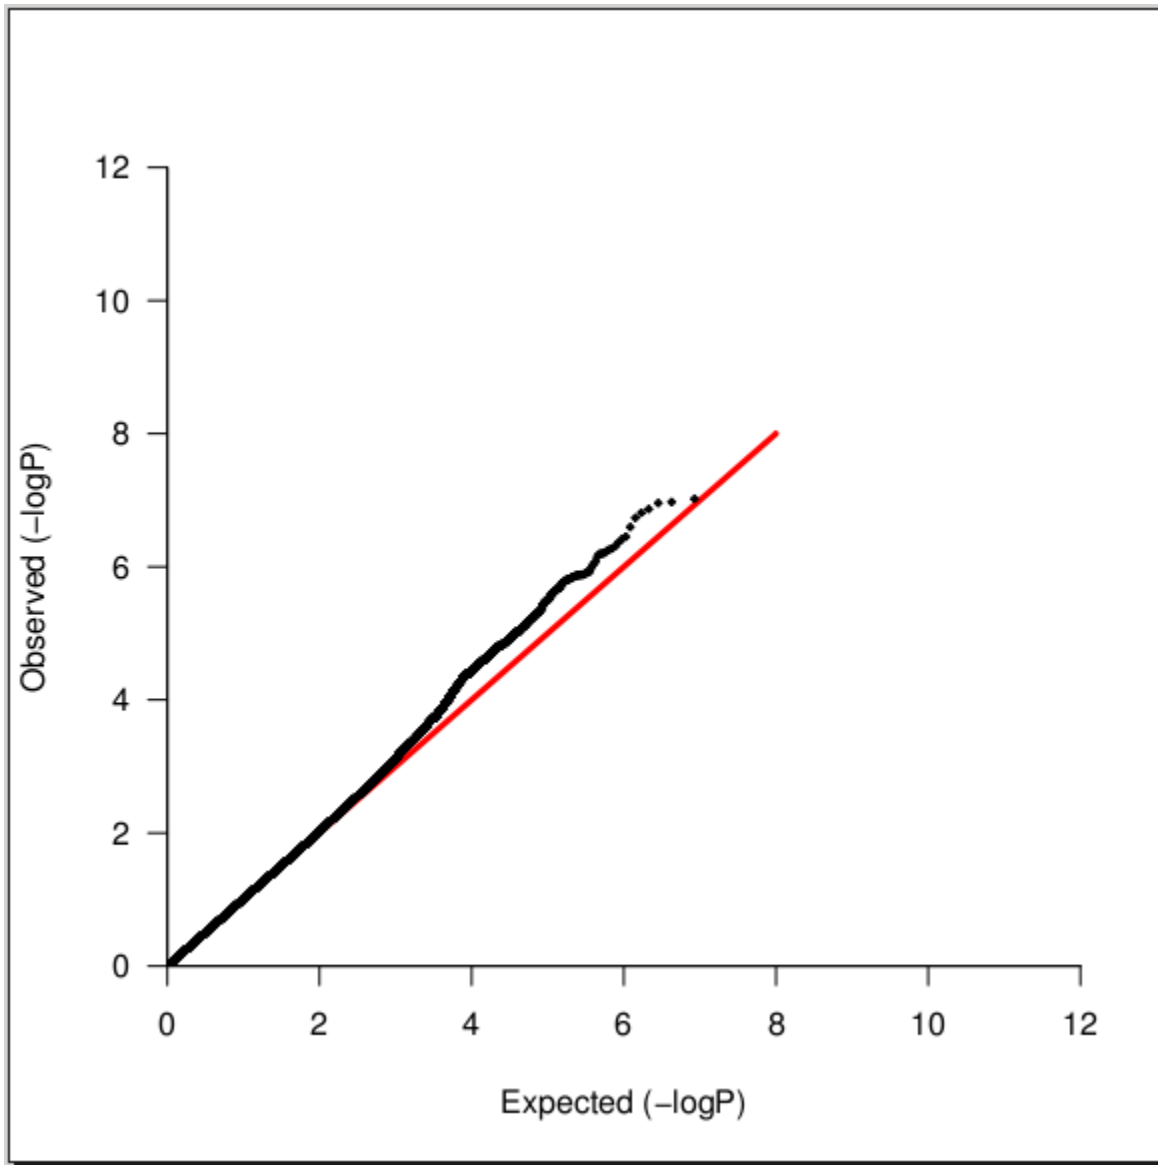

(h)

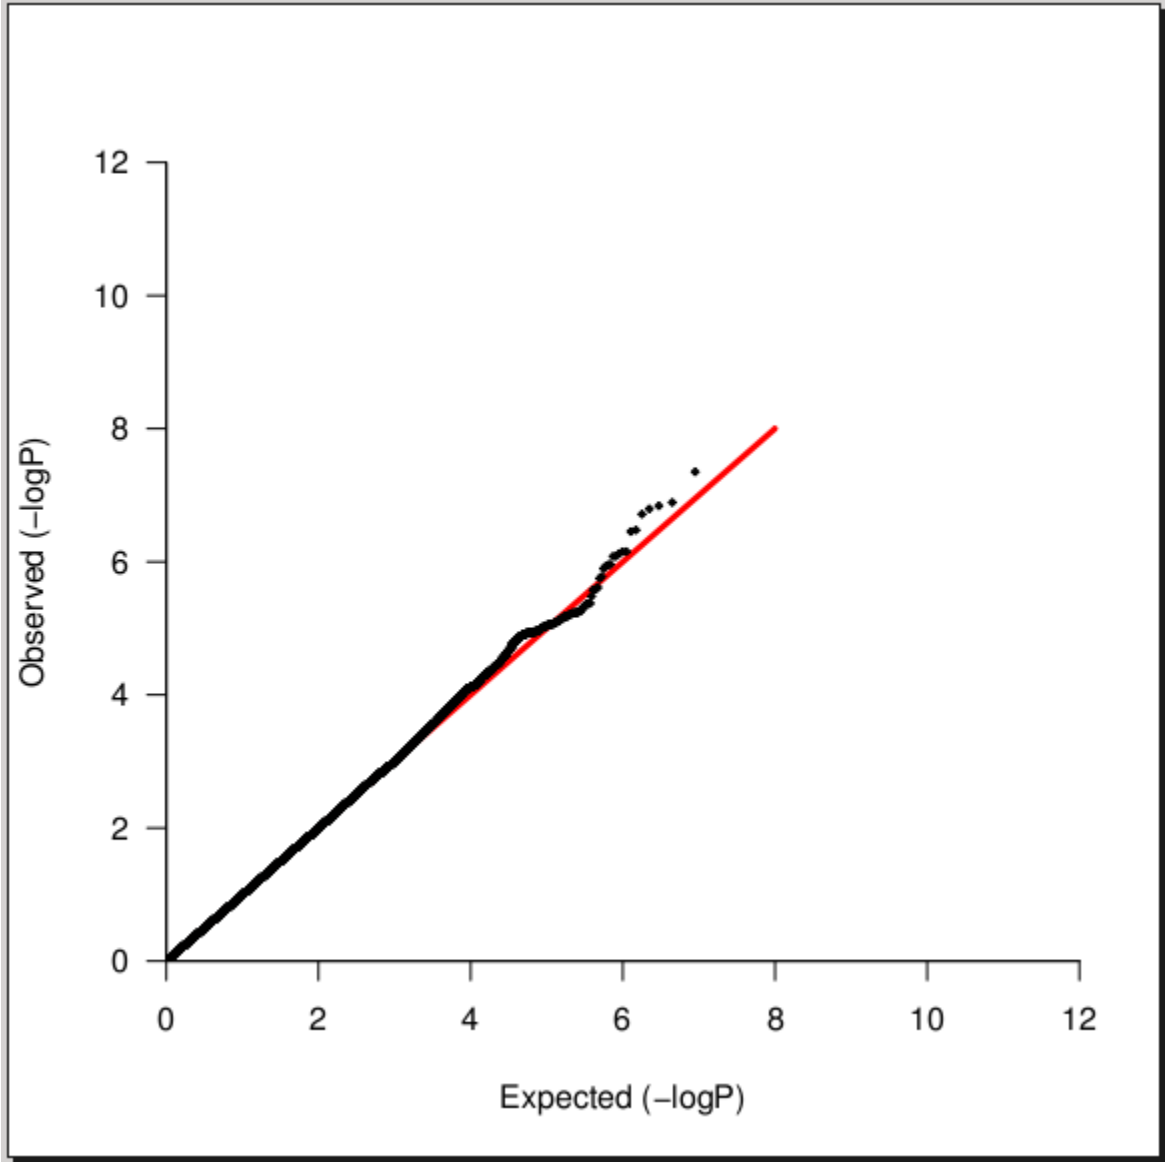

(i)



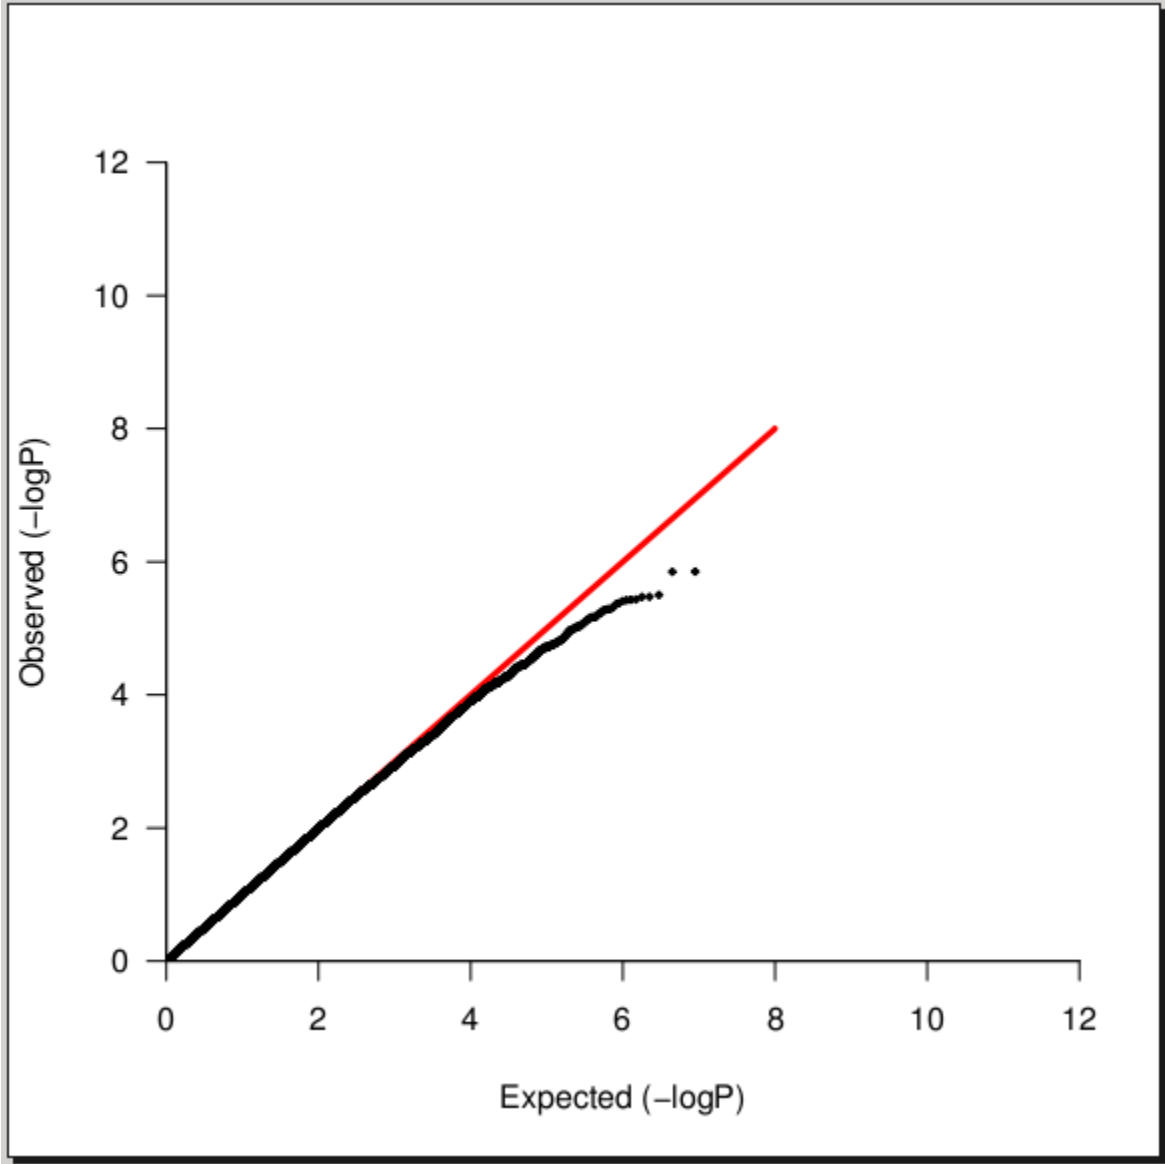

(j)

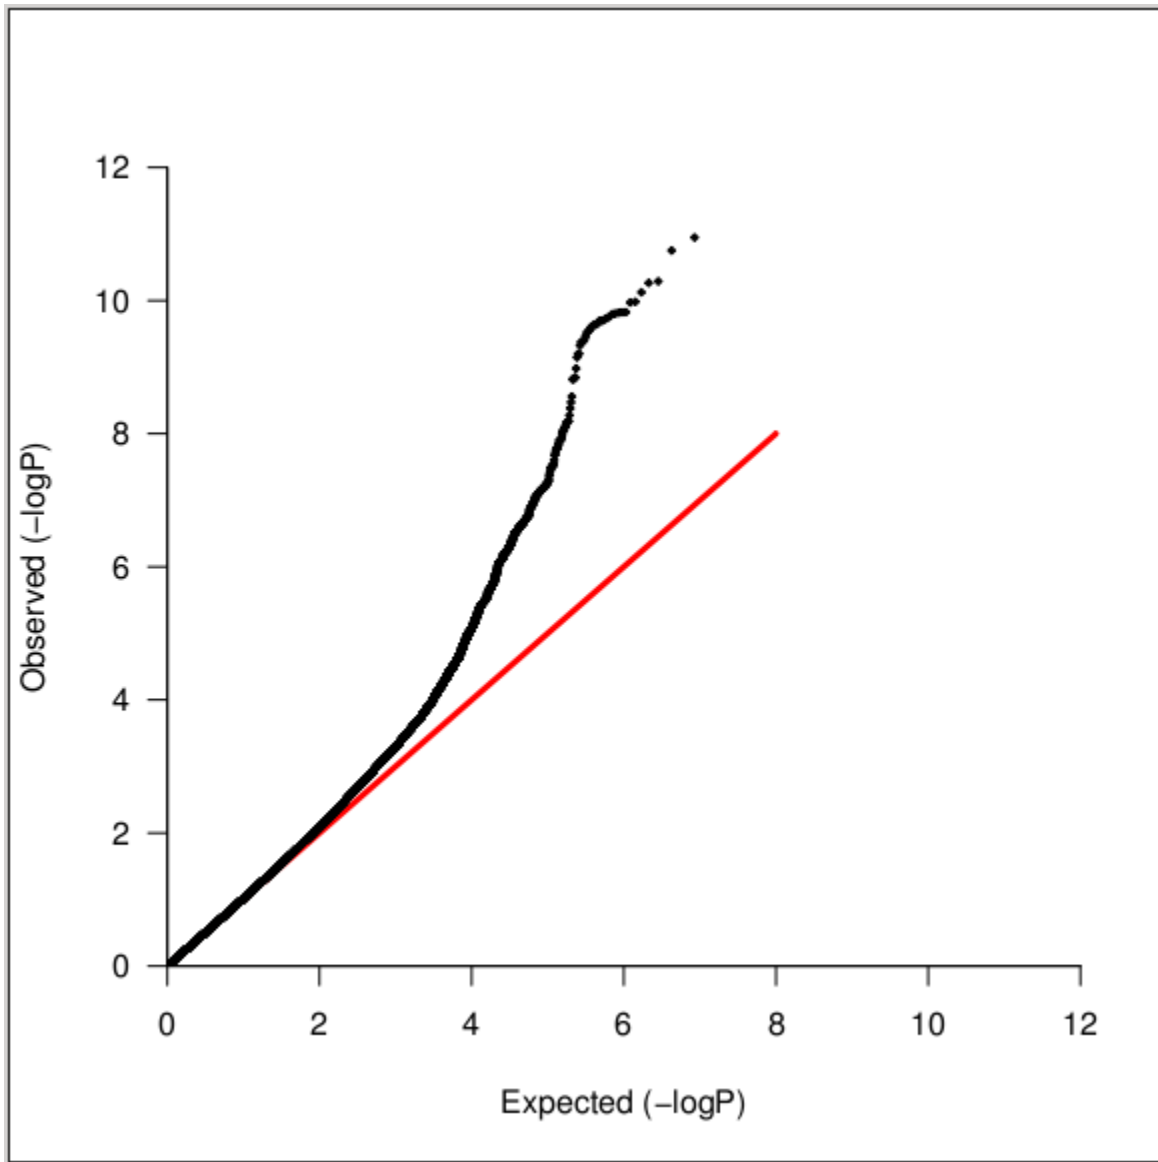

(k)

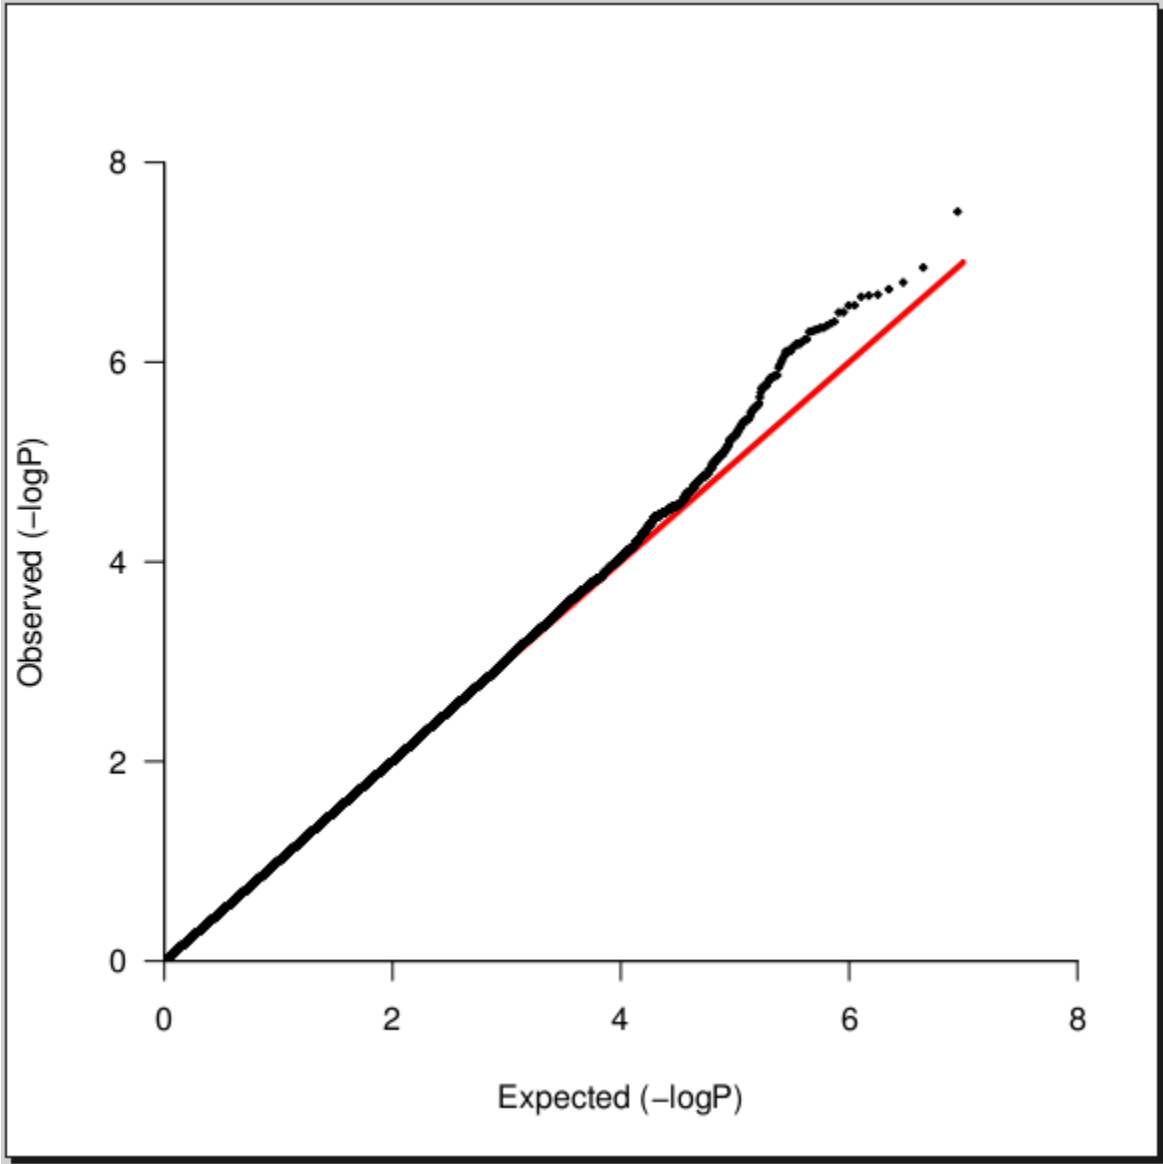

(i)

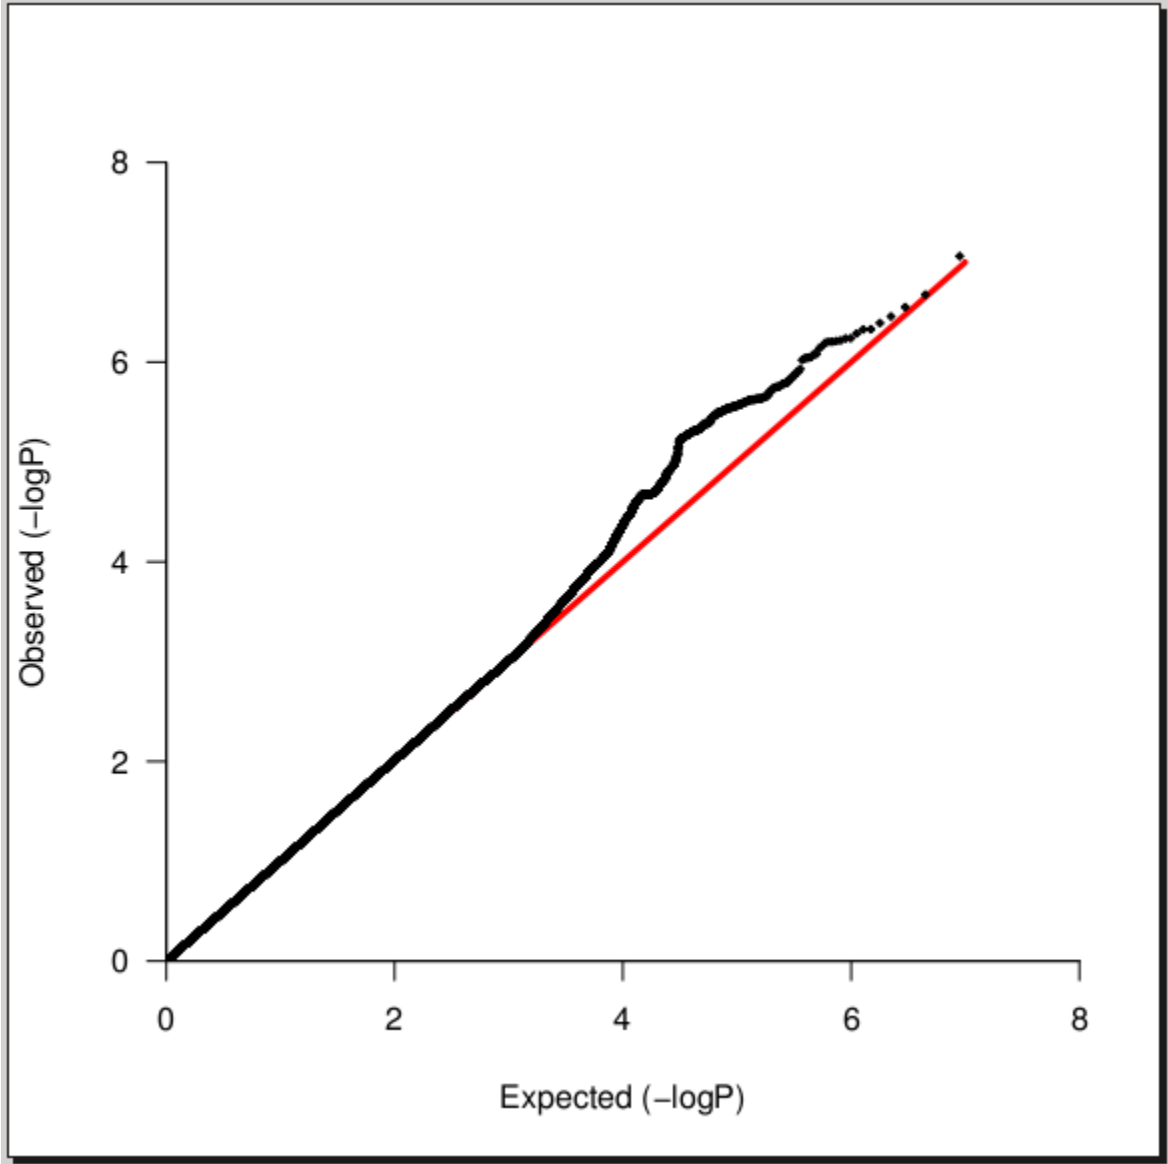

(m)

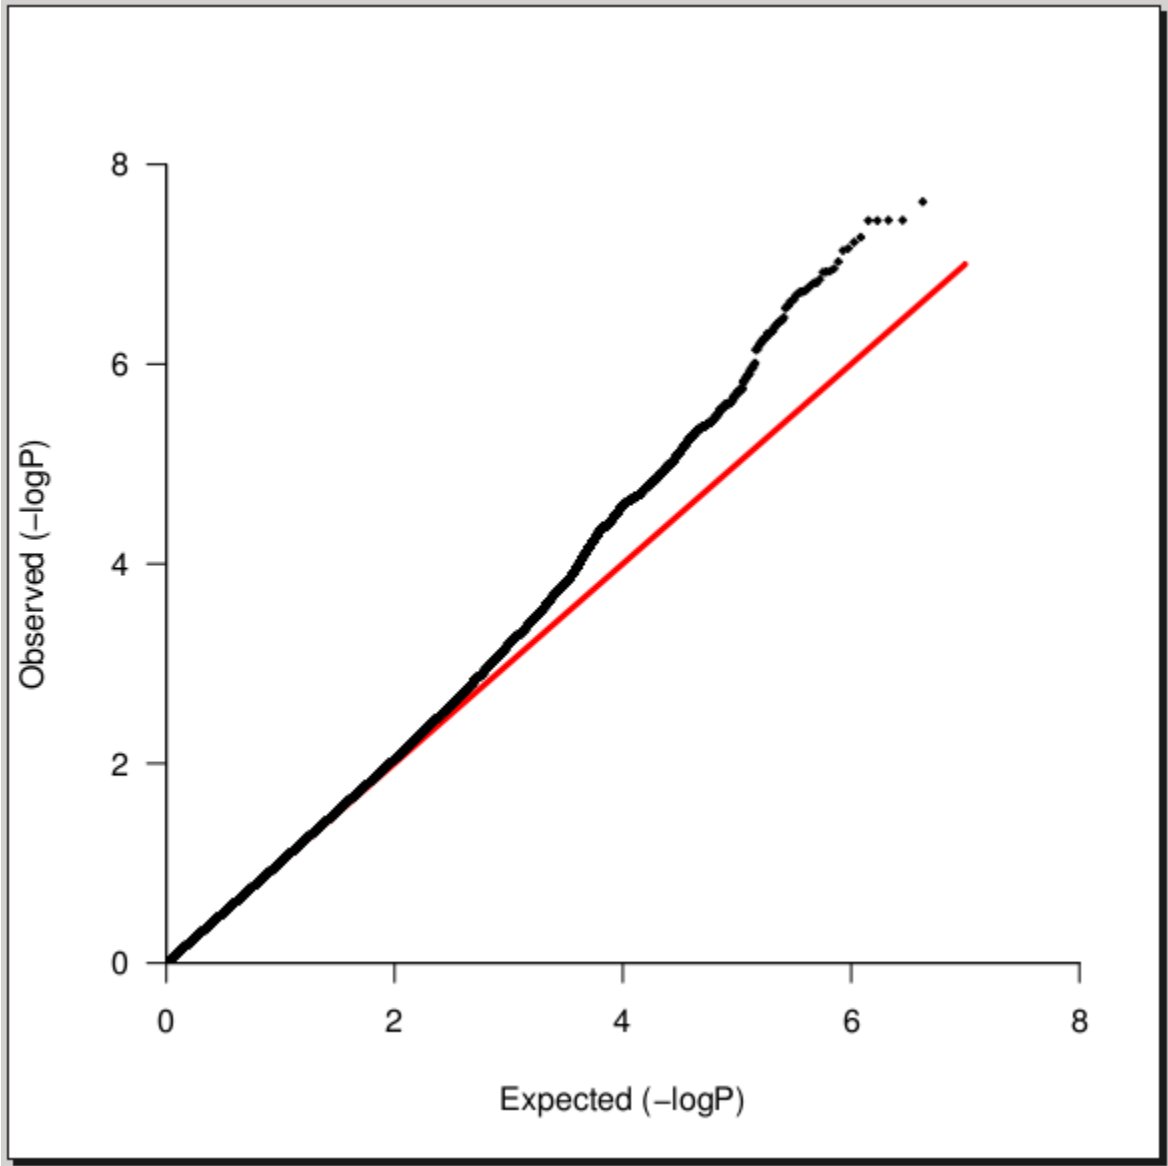

(n)

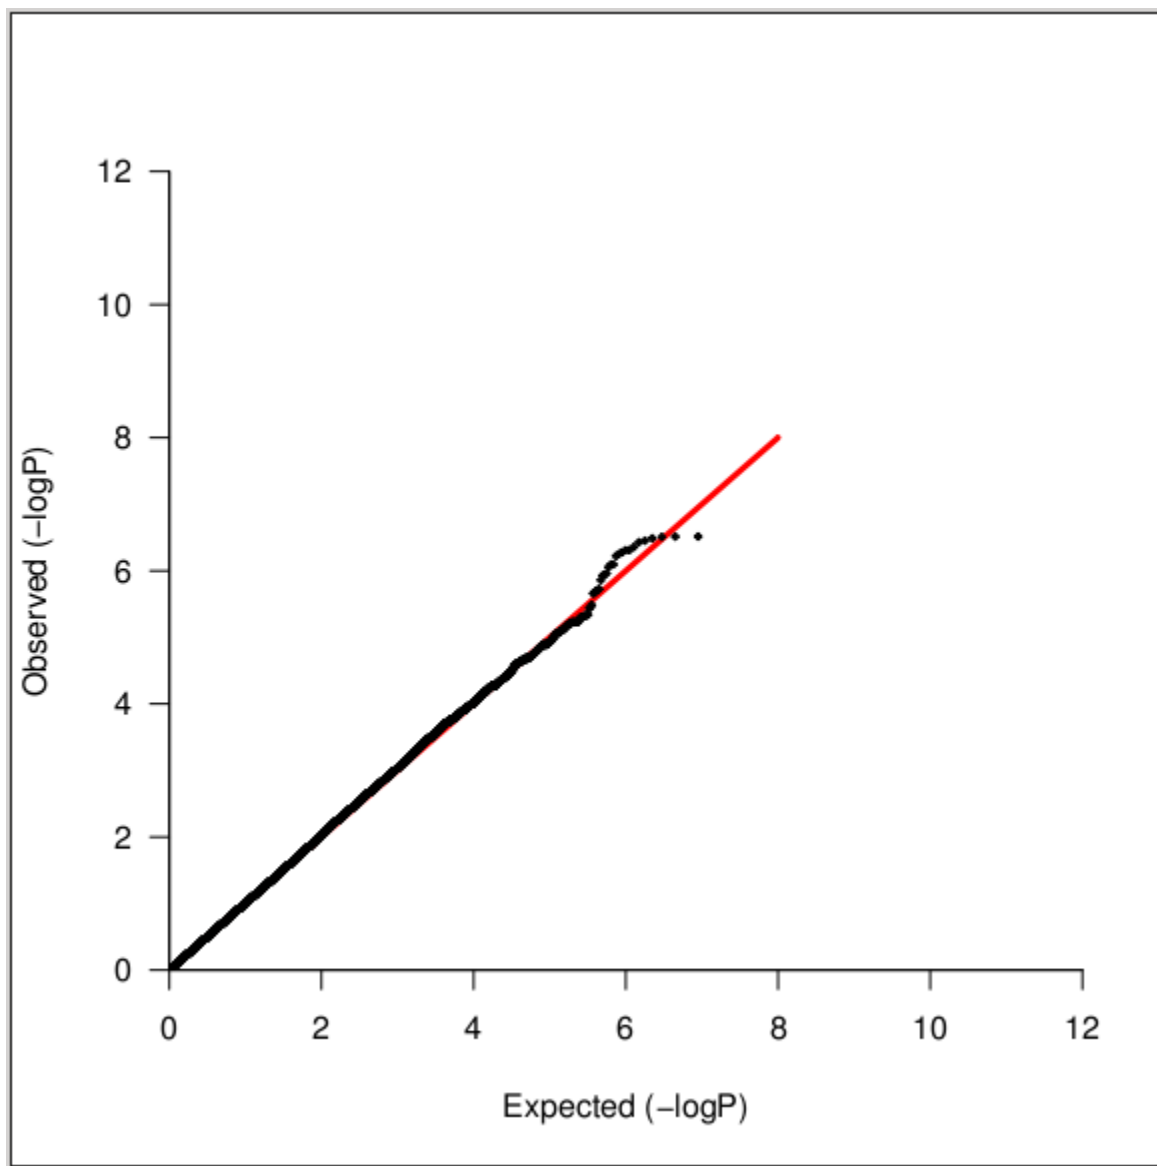

(o)

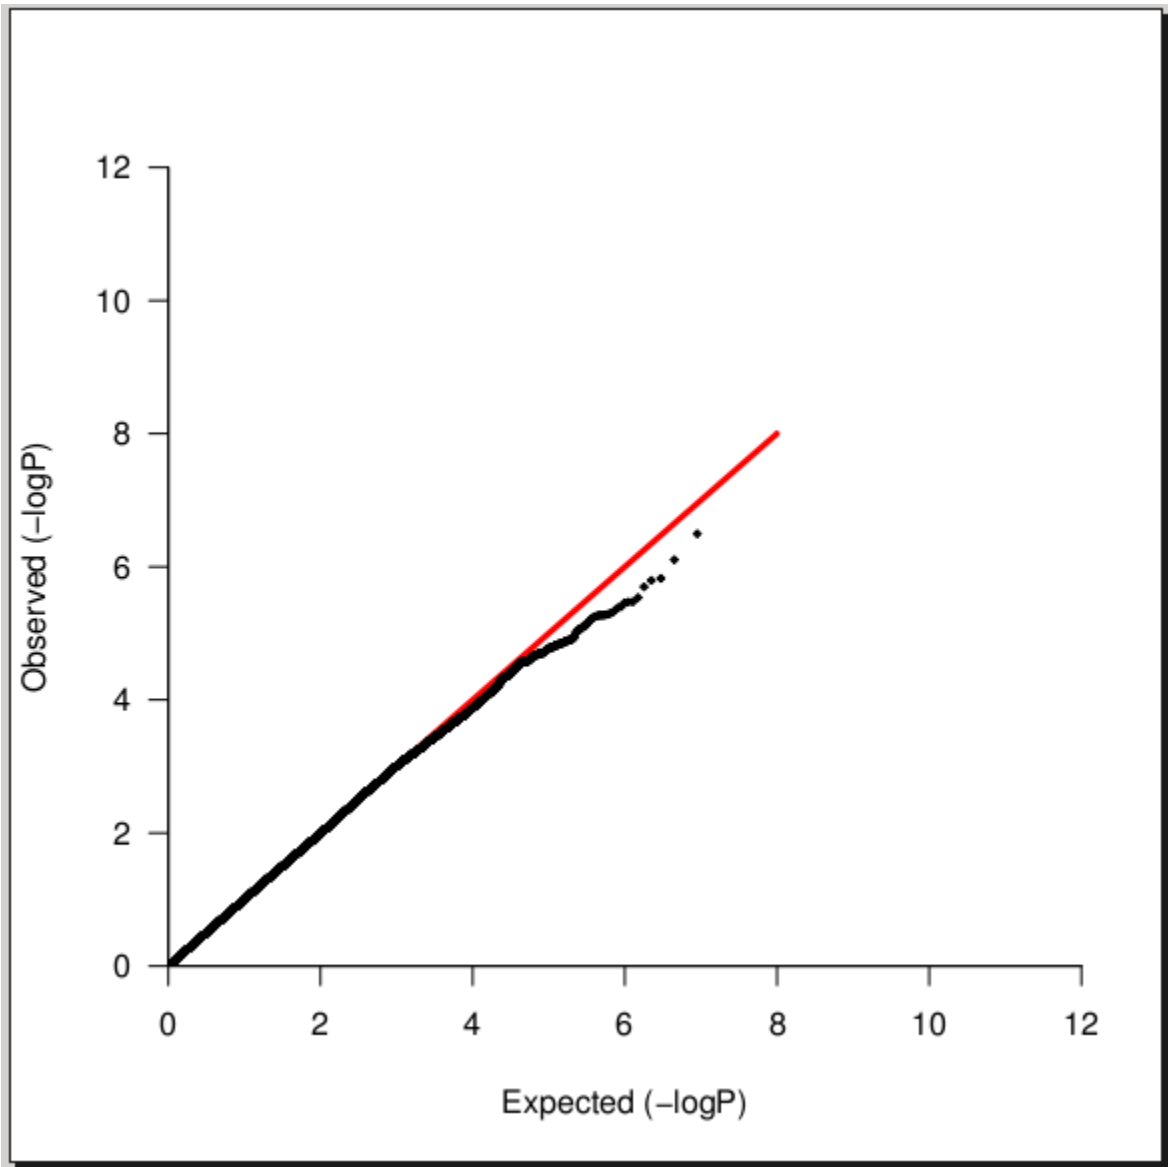

(p)

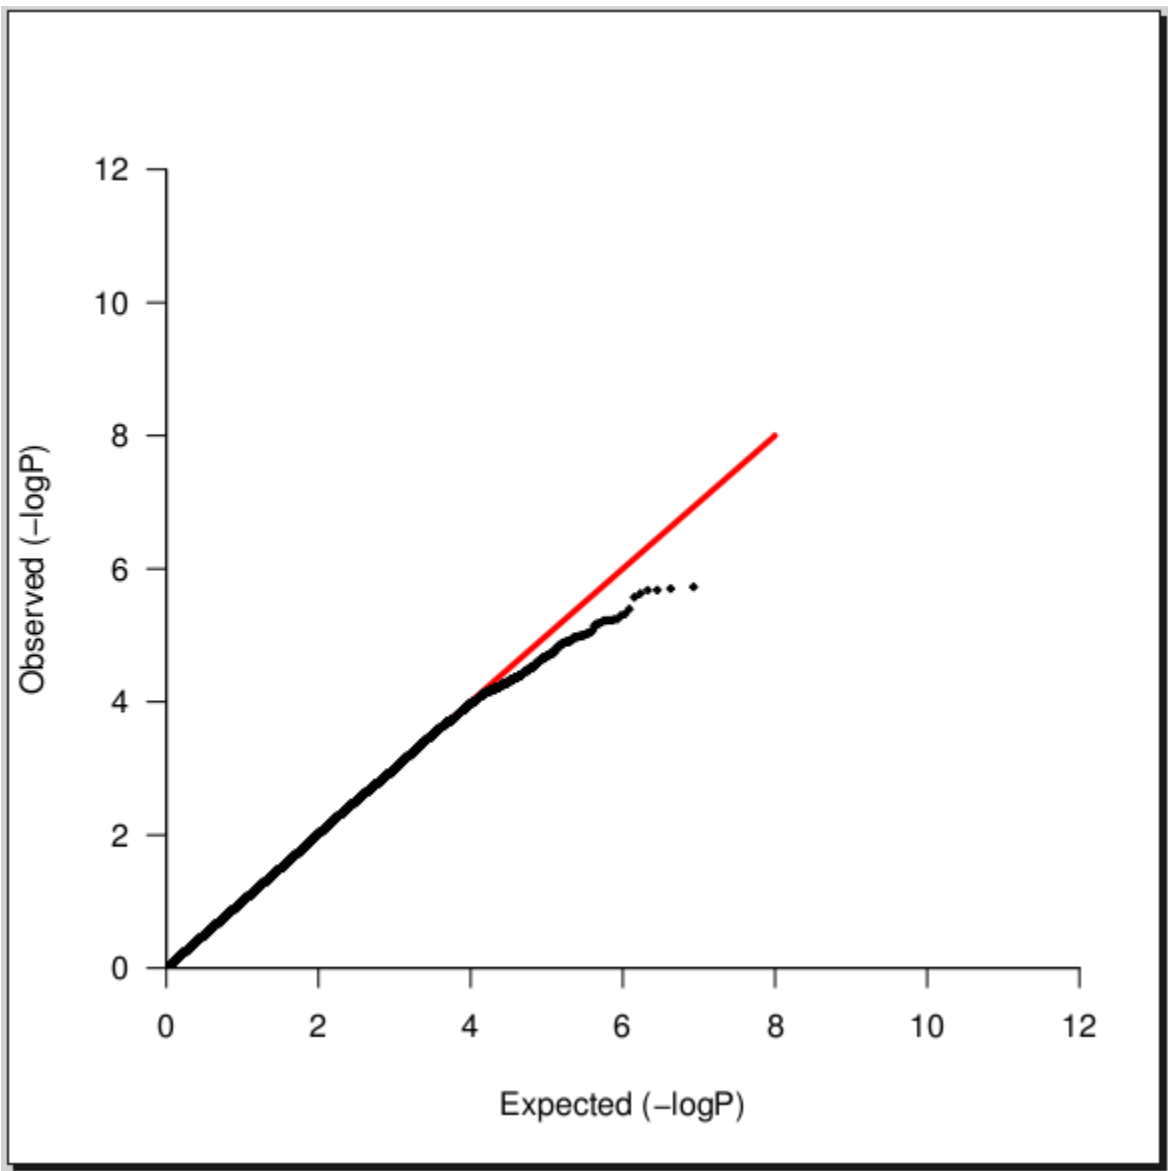

Supplement: fpc-27-7-s002.pdf [file fpc-27-7-s002.pdf]
