# Supplementary material for: Genome-wide association study of paliperidone efficacy
Source: PubMed Central journal article supplement — Pharmacogenet Genomics. 2016 Nov 11;27(1):7–18. doi: 10.1097/FPC.0000000000000250 (PMC5152628; doi:10.1097/fpc.0000000000000250), 2016-11-11

**Supplemental Digital Content Figure 1:** Manhattan plots of the GLM GWAS Meta-analyses. (a) Marder positive factor score, (b) Marder negative factor score, (c) total PANSS score, and (d) CGI-S. The dotted line indicates genome wide significance threshold of  $5 \times 10^{-8}$ . Only variants with  $p < 0.05$  are shown.

# Positive Marder Factor Score GWAS Meta Analysis (GLM)

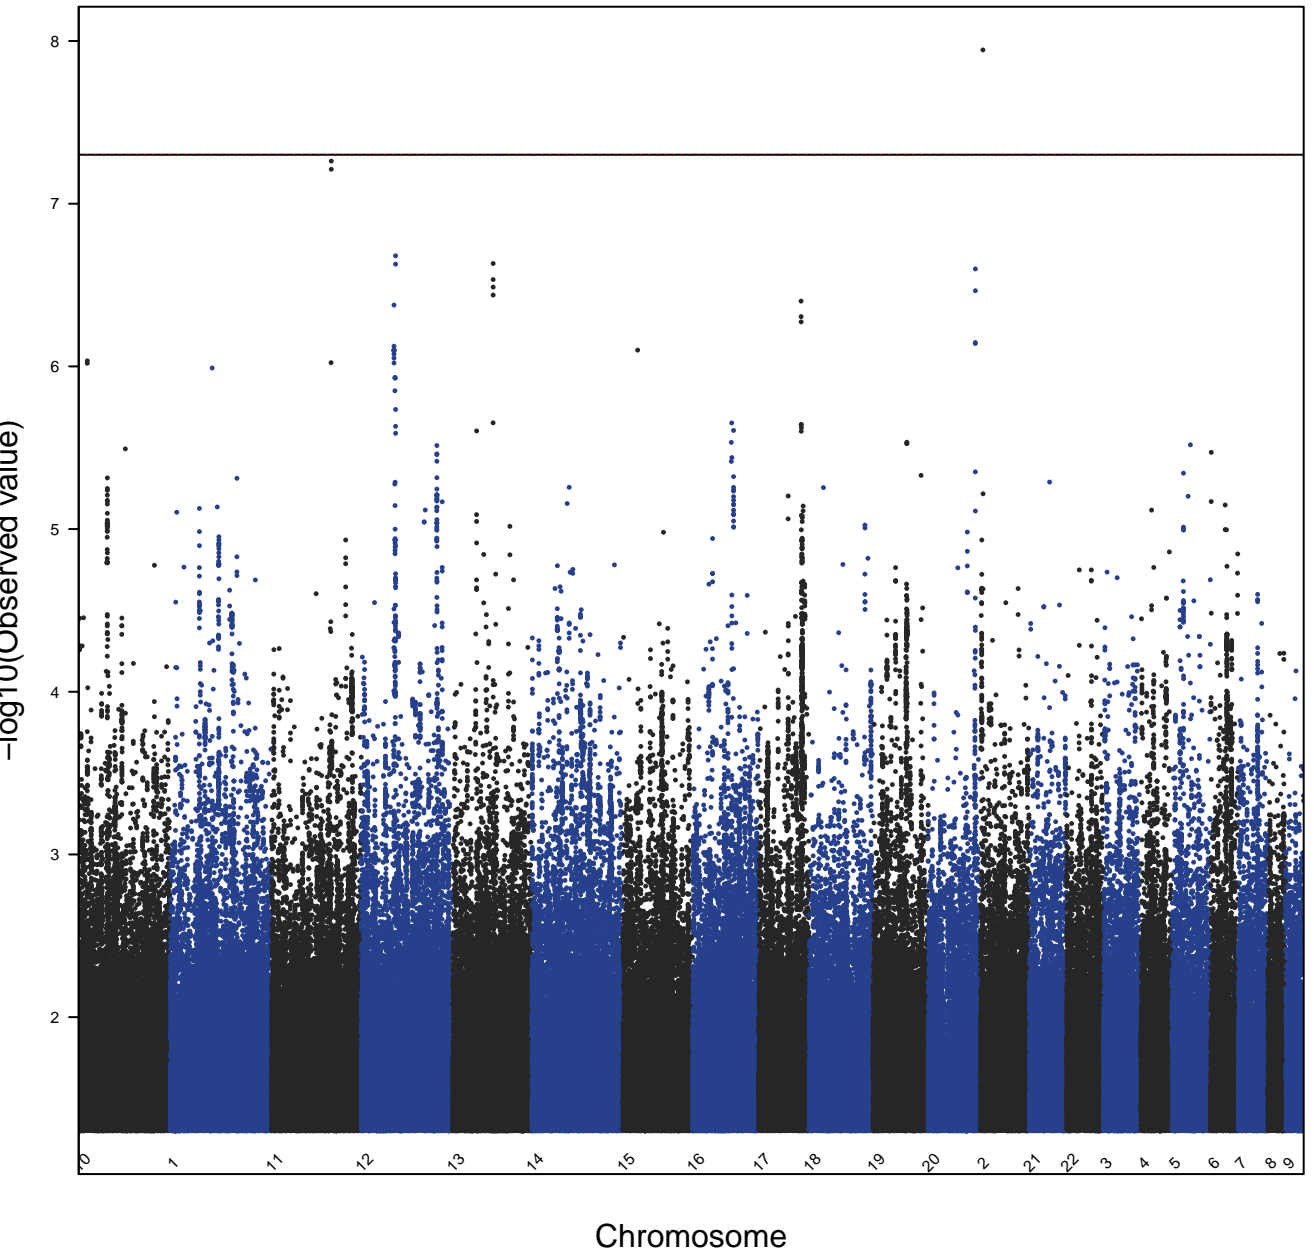

# Negative Marder Factor Score GWAS Meta Analysis (GLM)

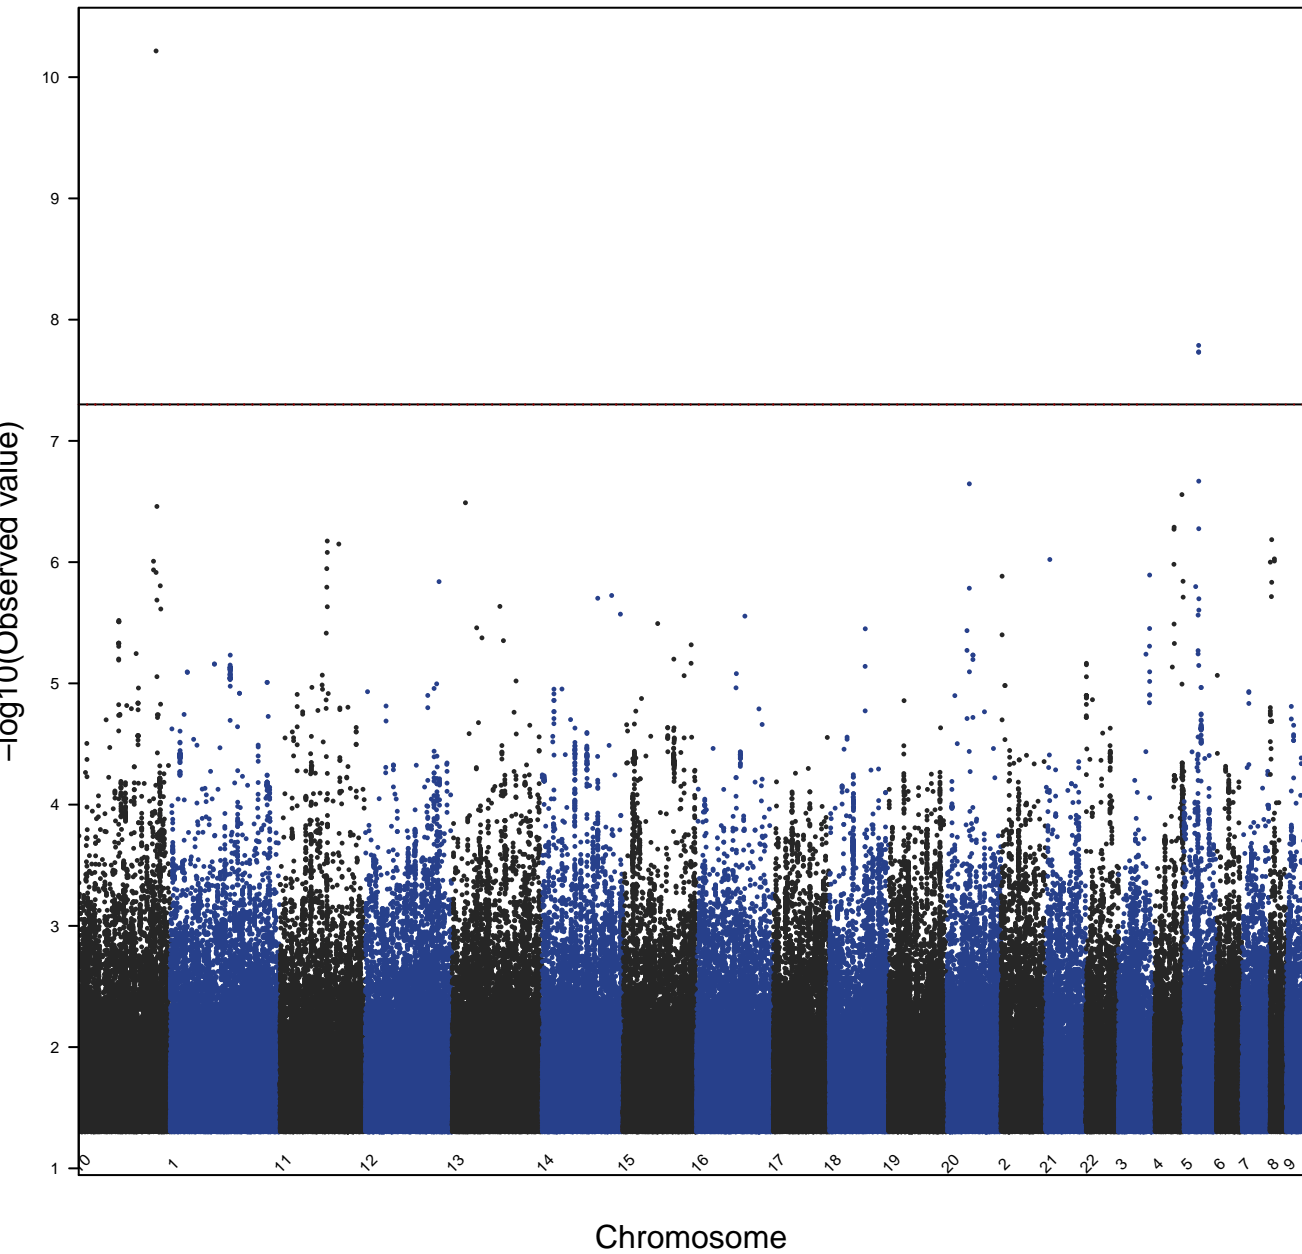

# Total PANSS Score GWAS Meta Analysis (GLM)

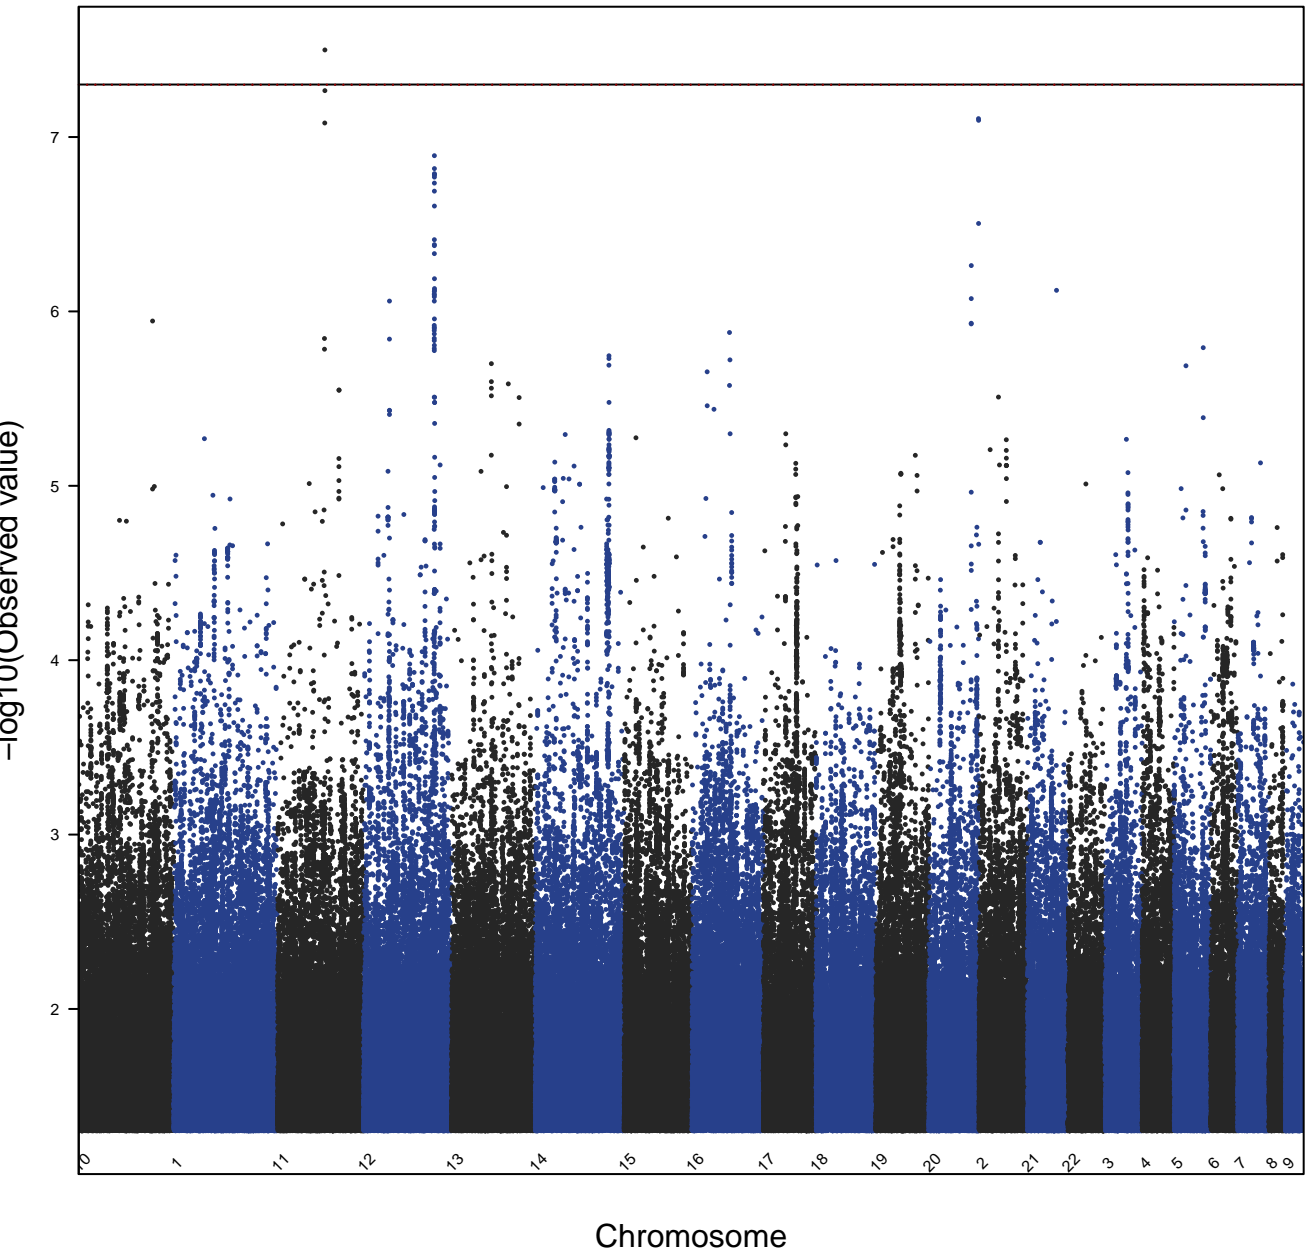

# CGIS GWAS Meta Analysis (GLM)

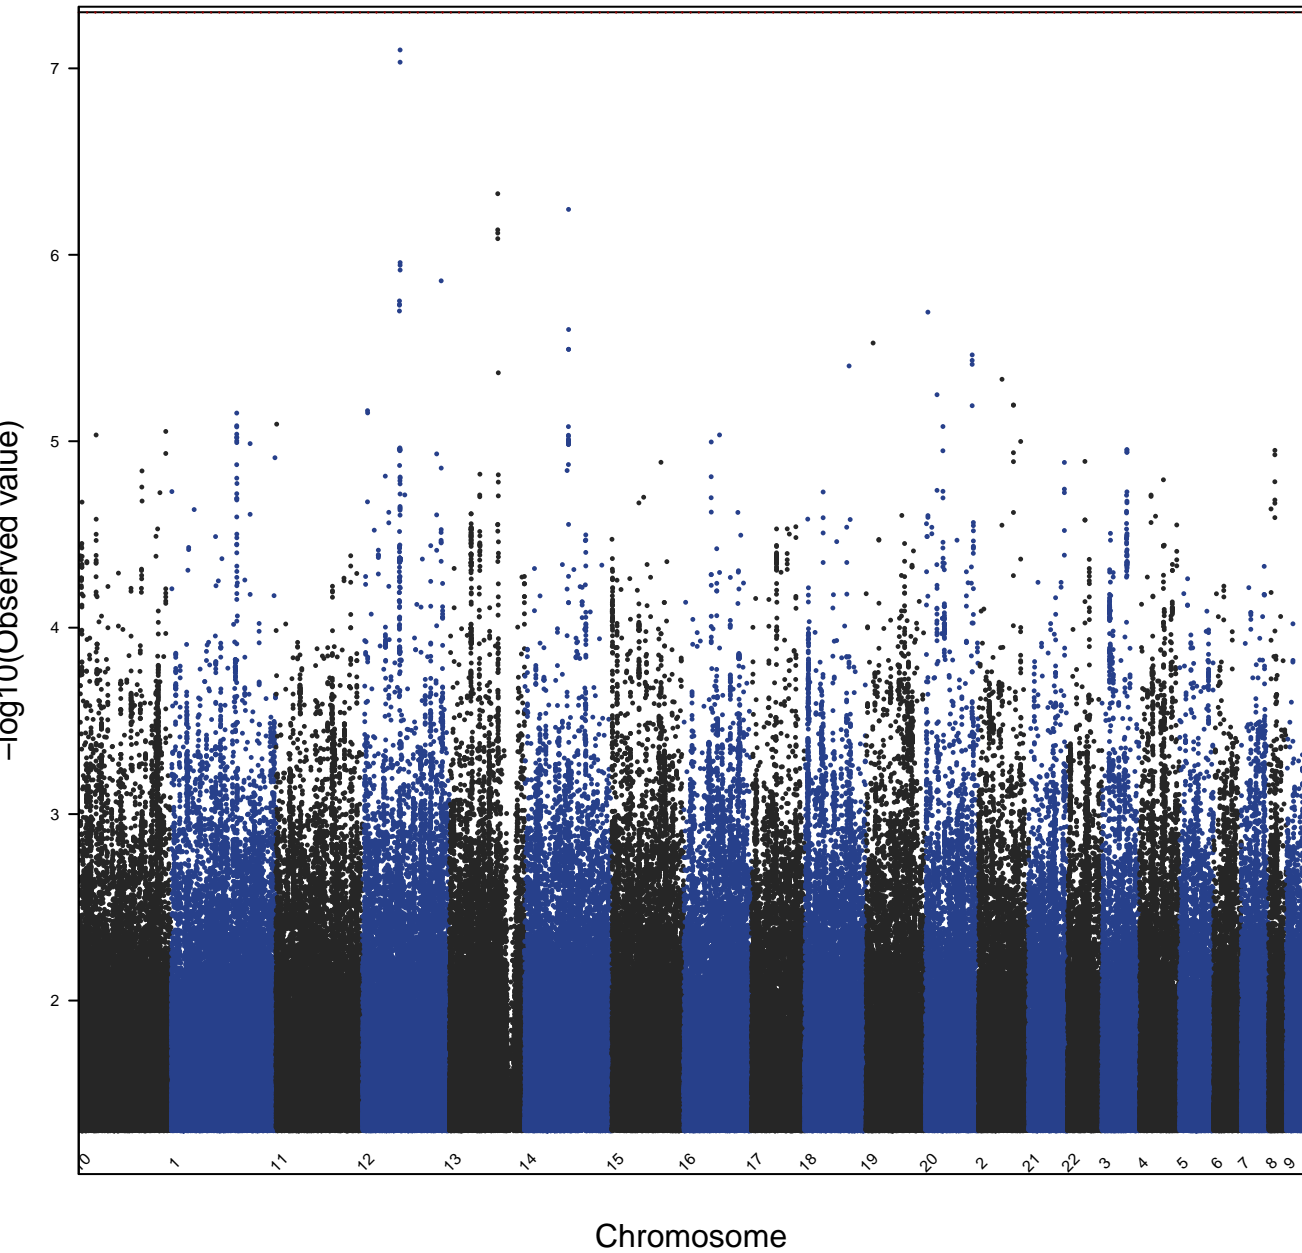

Supplement: fpc-27-7-s001.pdf [file fpc-27-7-s001.pdf]
