# Supplementary material for: Genome-wide association study of paliperidone efficacy
Source: PubMed Central journal article supplement — Pharmacogenet Genomics. 2016 Nov 11;27(1):7–18. doi: 10.1097/FPC.0000000000000250 (PMC5152628; doi:10.1097/fpc.0000000000000250), 2016-11-11

**Supplemental Digital Content Figure 3:** Manhattan plots of the MLM GWAS Analyses. Univariate analysis (a) Marder positive factor score, (b) total PANSS score , (c) Marder negative factor score, (d) CGI-S and multivariate analysis of Marder positive factor score, Marder negative factor score, total PANSS score , and CGI-S (e). The dotted line indicates genome wide significance threshold of  $5 \times 10^{-8}$ . Only variants with  $p < 0.05$  are shown.

# Positive Marder Factor Score Univariate GWAS Analysis (MLM)

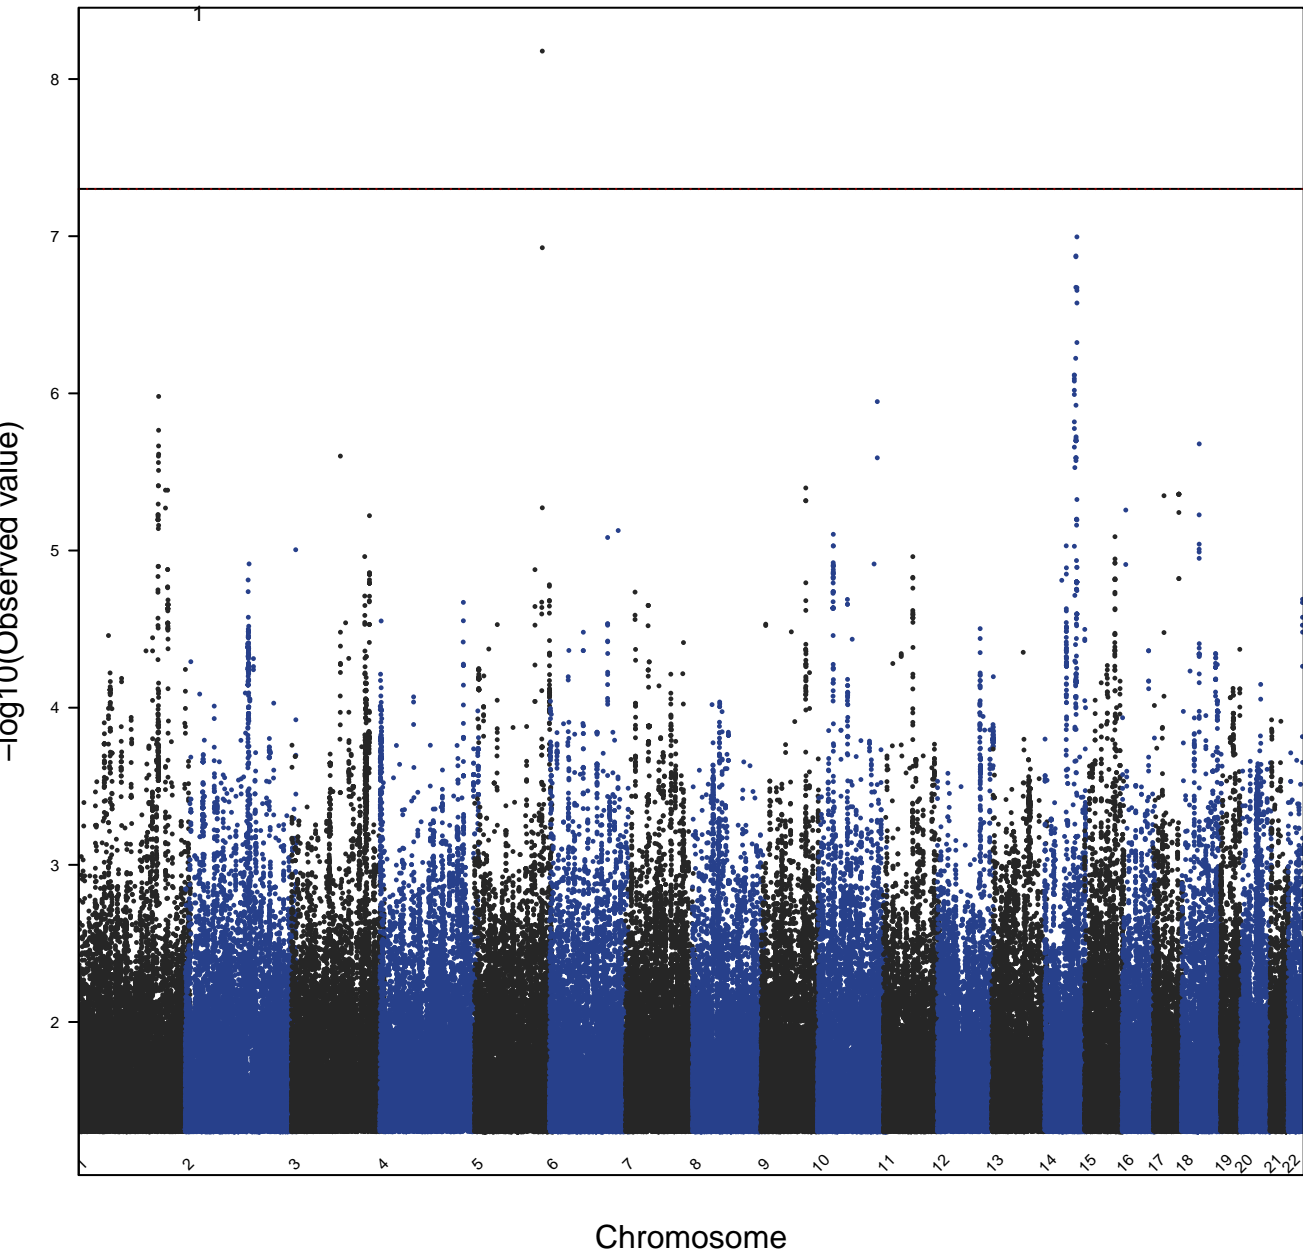

# Total PANSS Score Univariate GWAS Analysis (MLM)

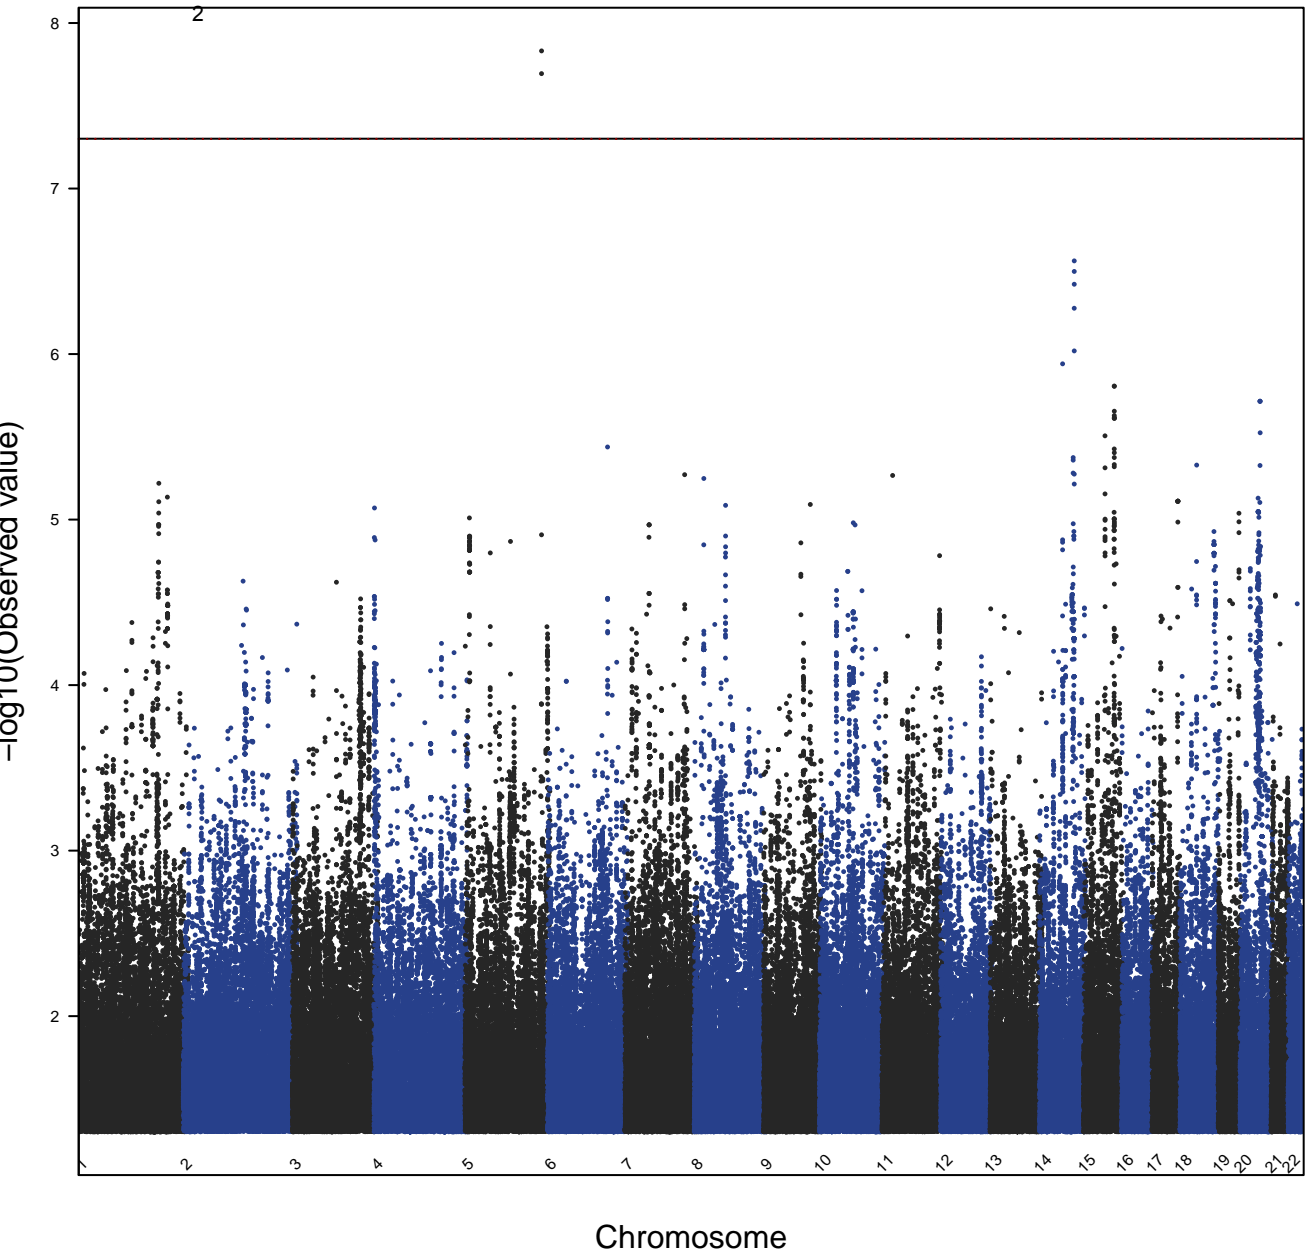

# Negative Marder Factor Score Univariate GWAS Analysis (MLM)

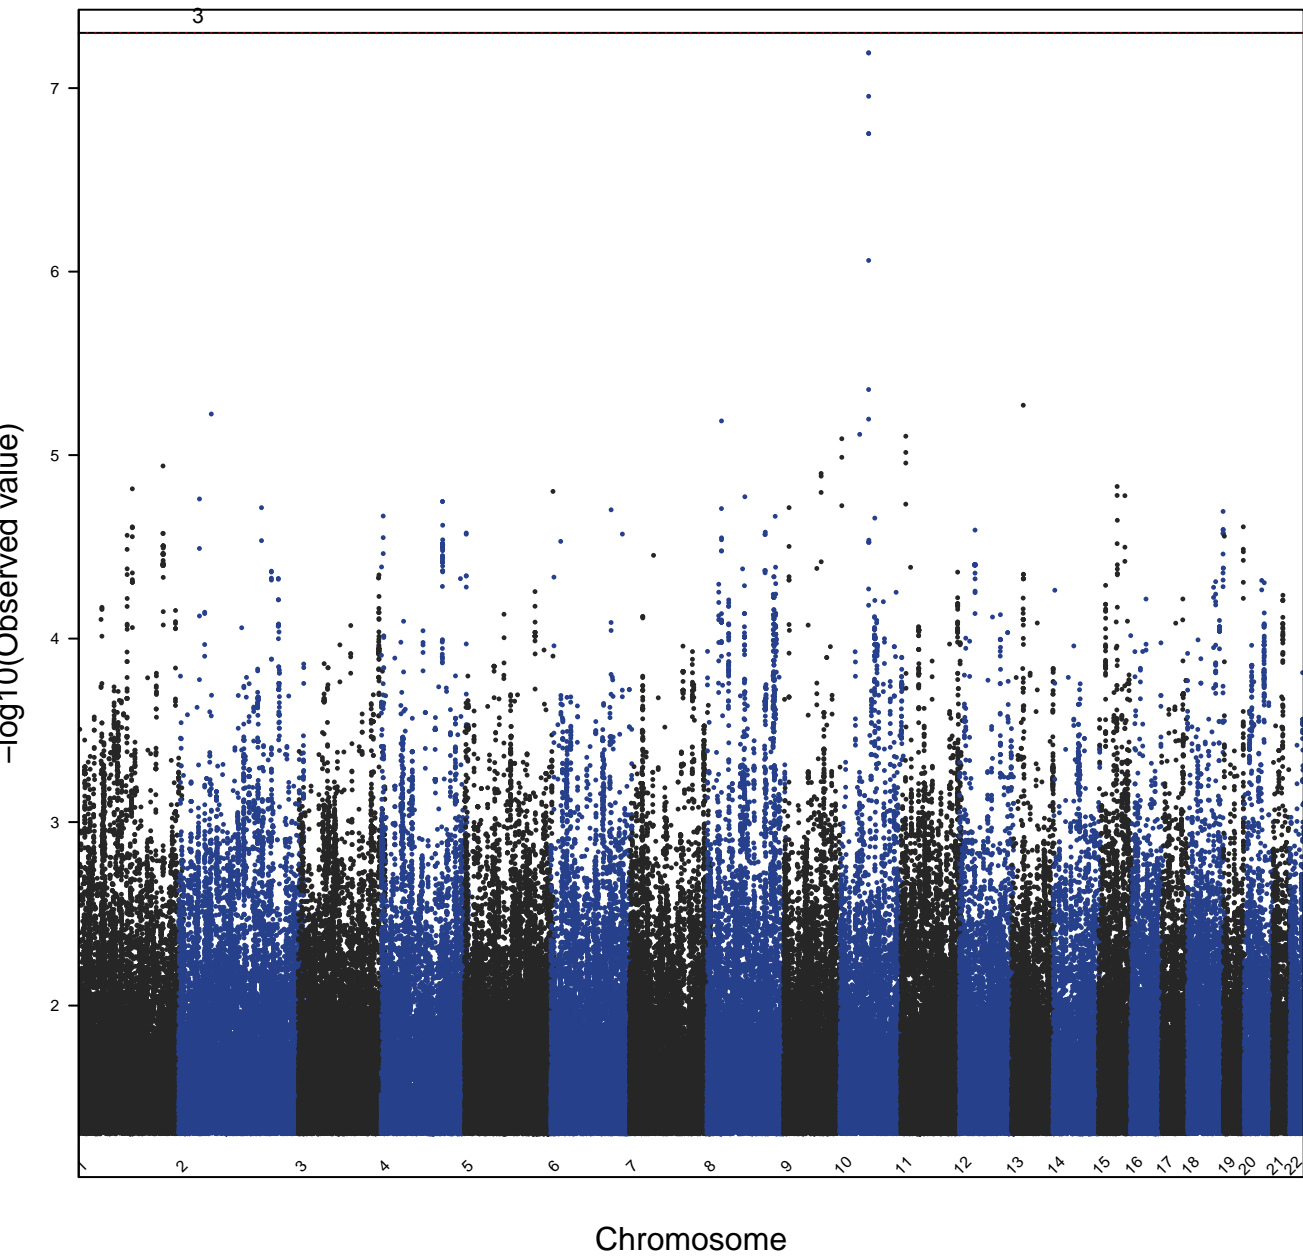

# CGIS Univariate GWAS Analysis (MLM)

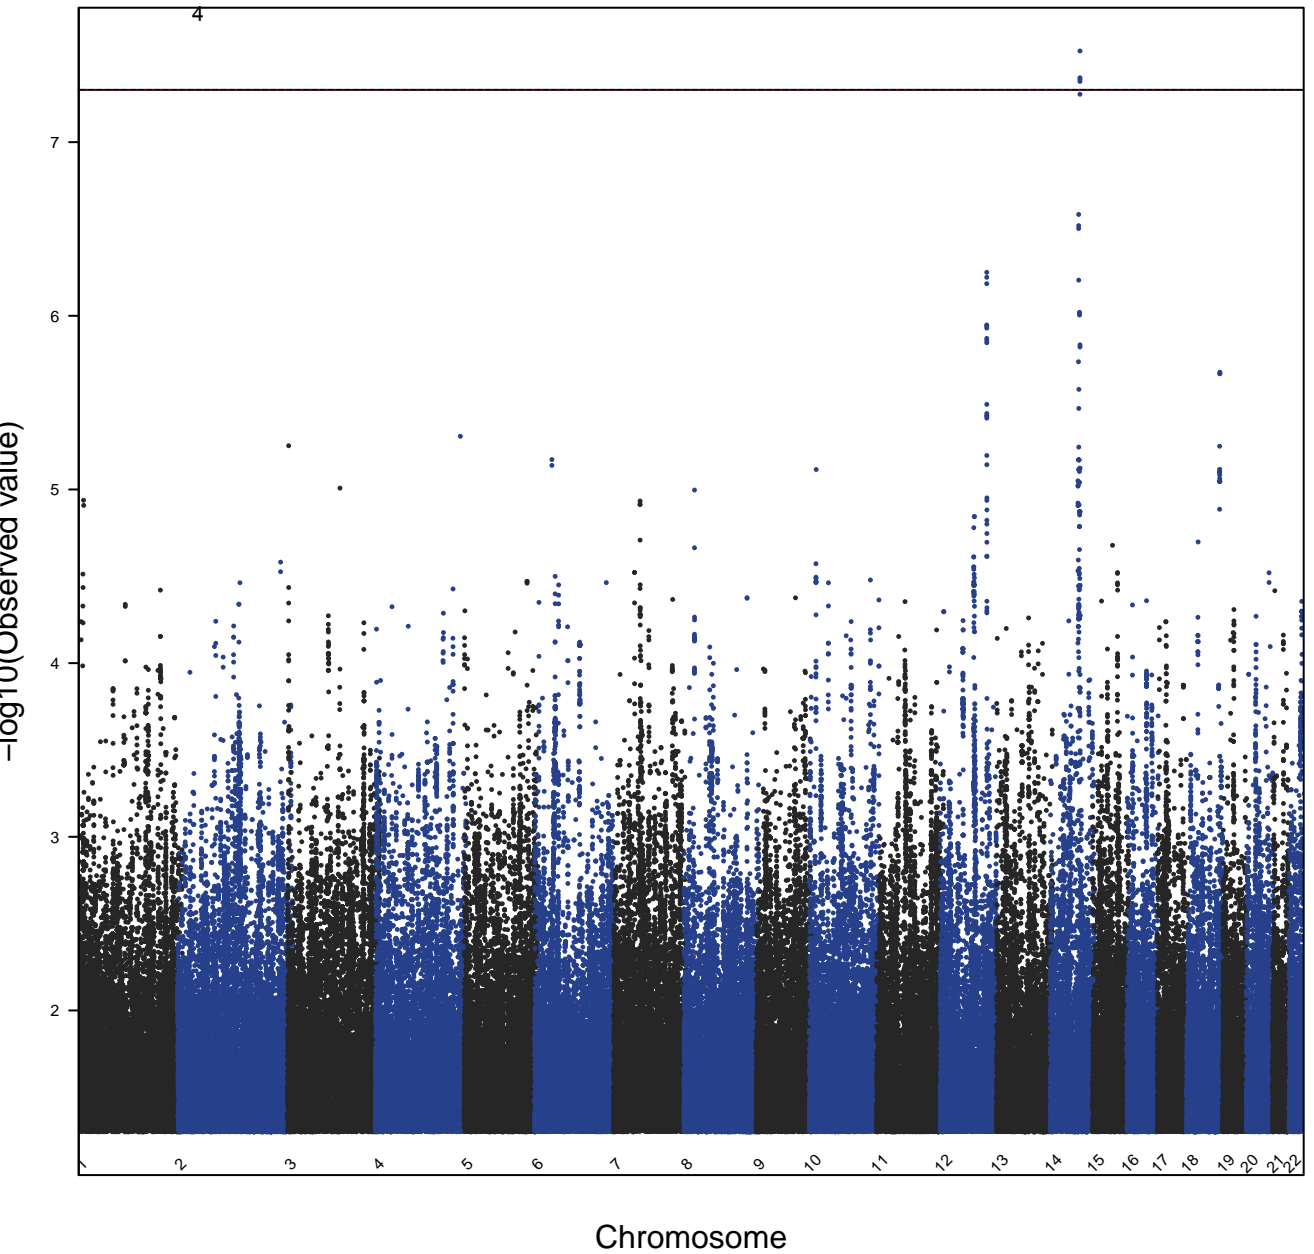

# Multivariate GWAS Analysis (MLM)

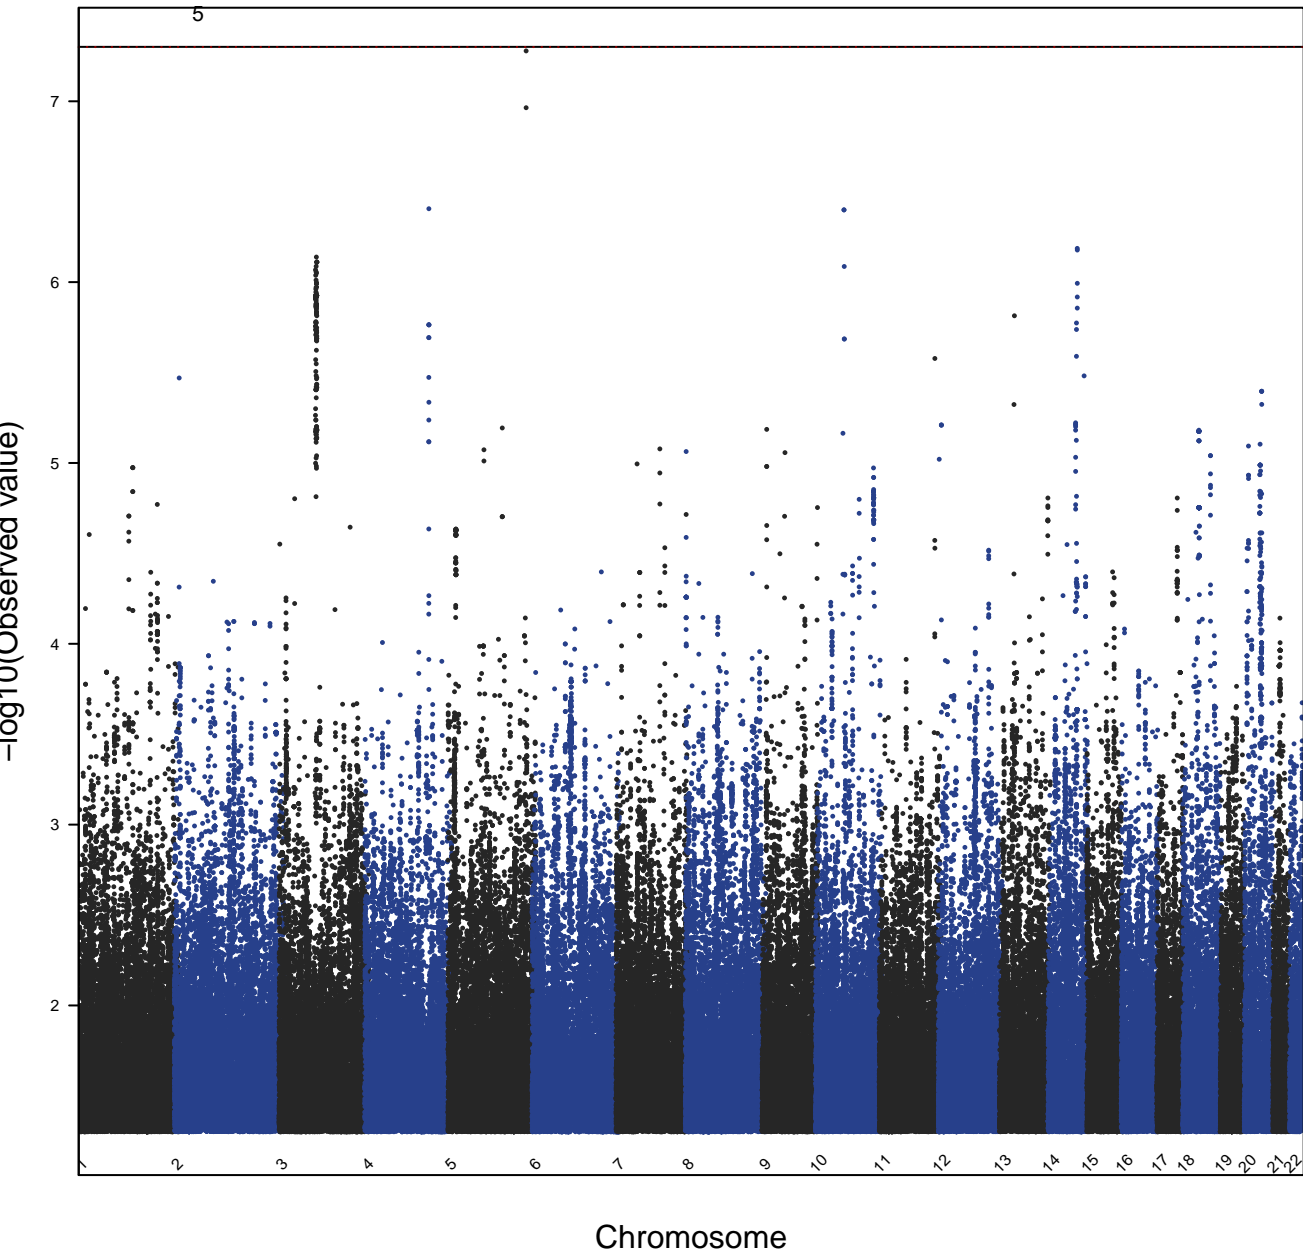

Supplement: fpc-27-7-s003.pdf [file fpc-27-7-s003.pdf]
