# Supplementary material for: Genome-wide association study of paliperidone efficacy
Source: PubMed Central journal article supplement — Pharmacogenet Genomics. 2016 Nov 11;27(1):7–18. doi: 10.1097/FPC.0000000000000250 (PMC5152628; doi:10.1097/fpc.0000000000000250), 2016-11-11

**Supplemental Digital Content Figure 4.** QQ plots for MLM GWAS analyses based on association statistics of all imputed markers based on univariate analysis of (a) Marder positive factor score, (b) Marder negative factor score, (c) total PANSS score, (d) CGI-S, and multivariate analysis of (e) Marder positive factor score, Marder negative factor score, total PANSS score, and CGI-S.

(a)

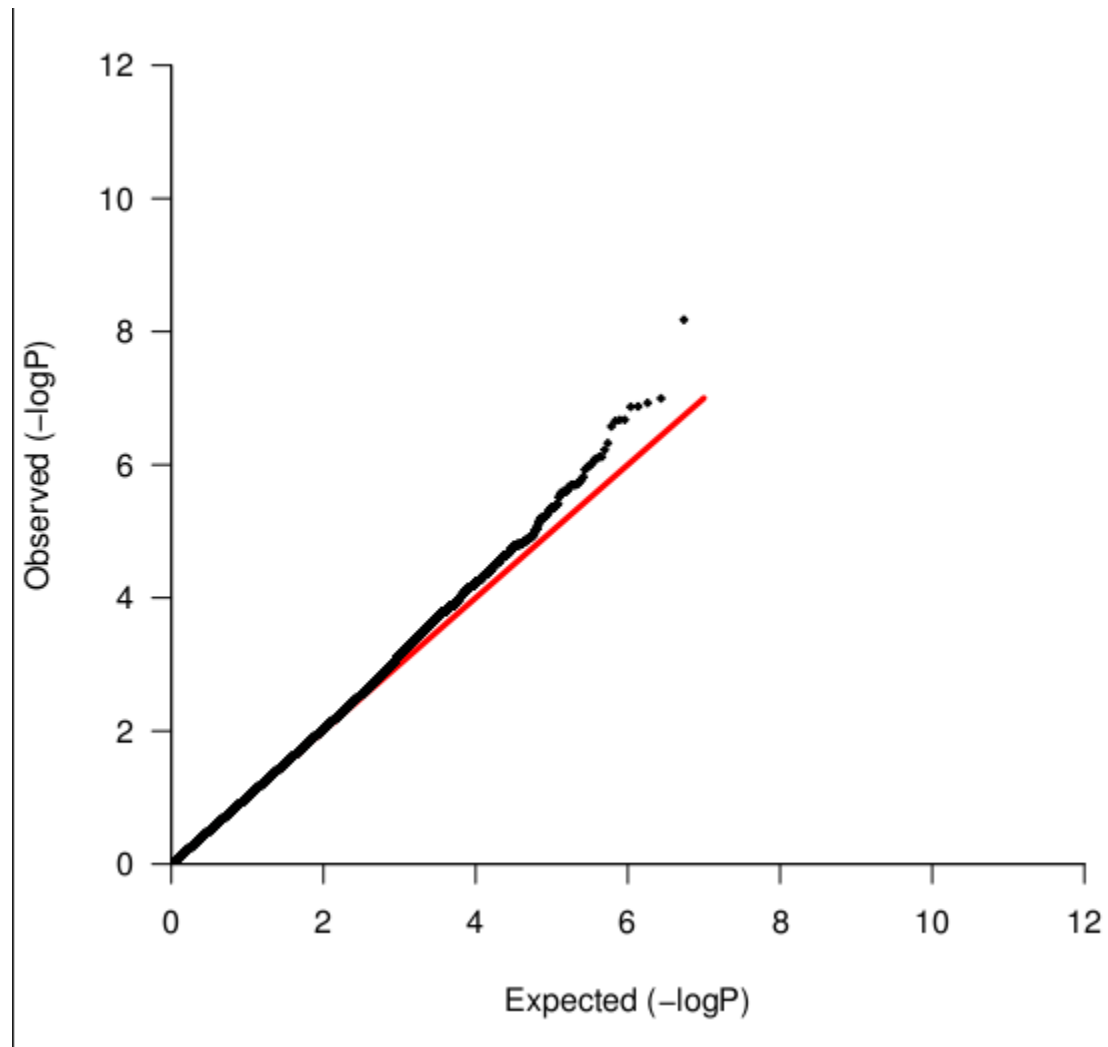

(b)

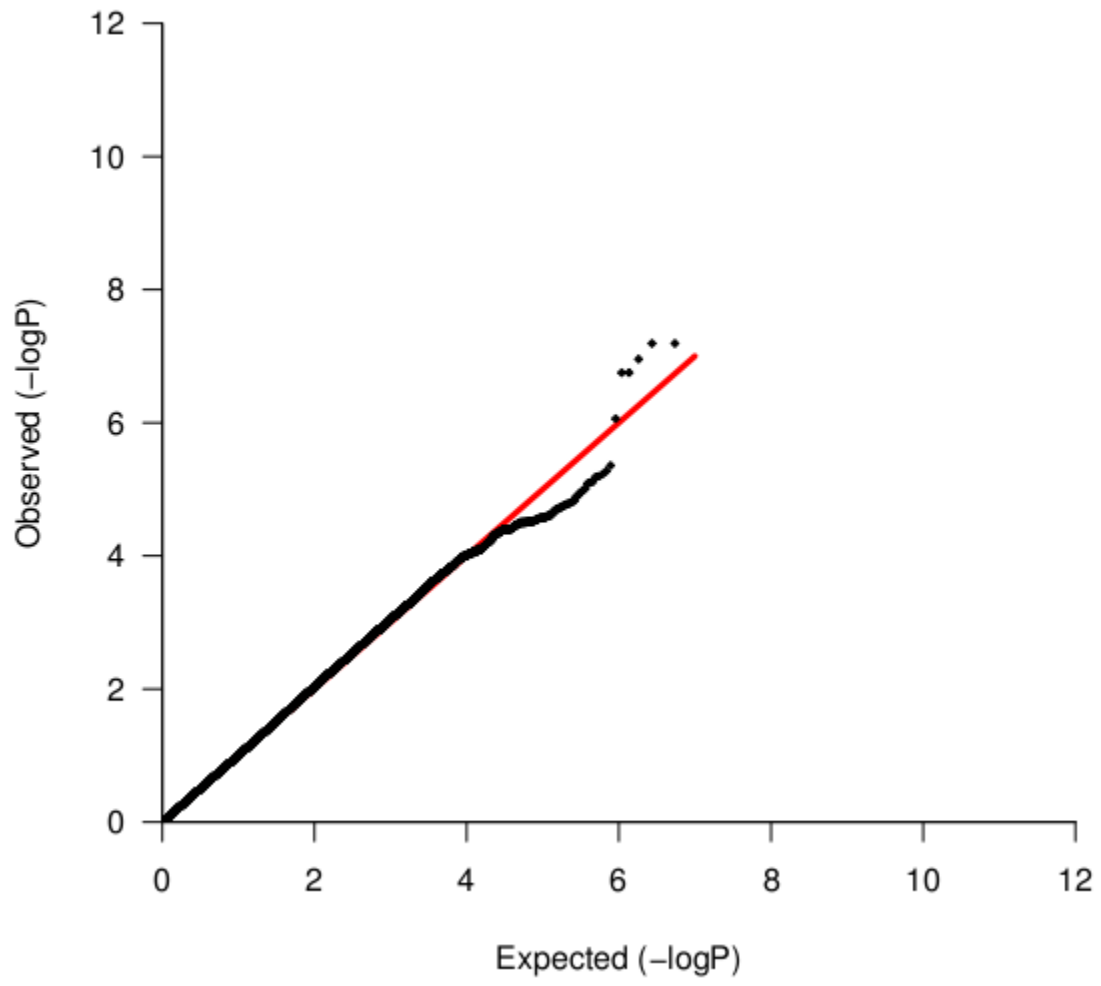

(c)

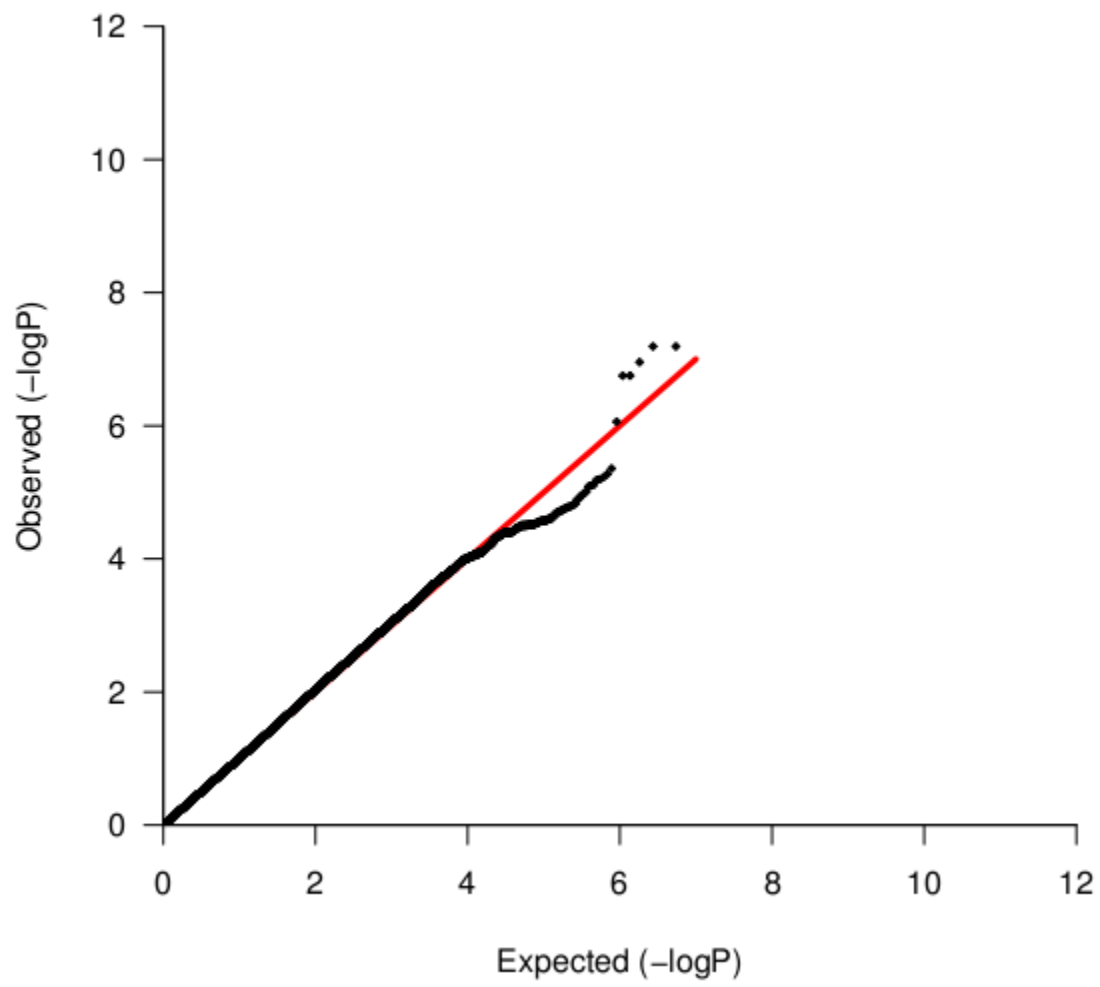

(d)

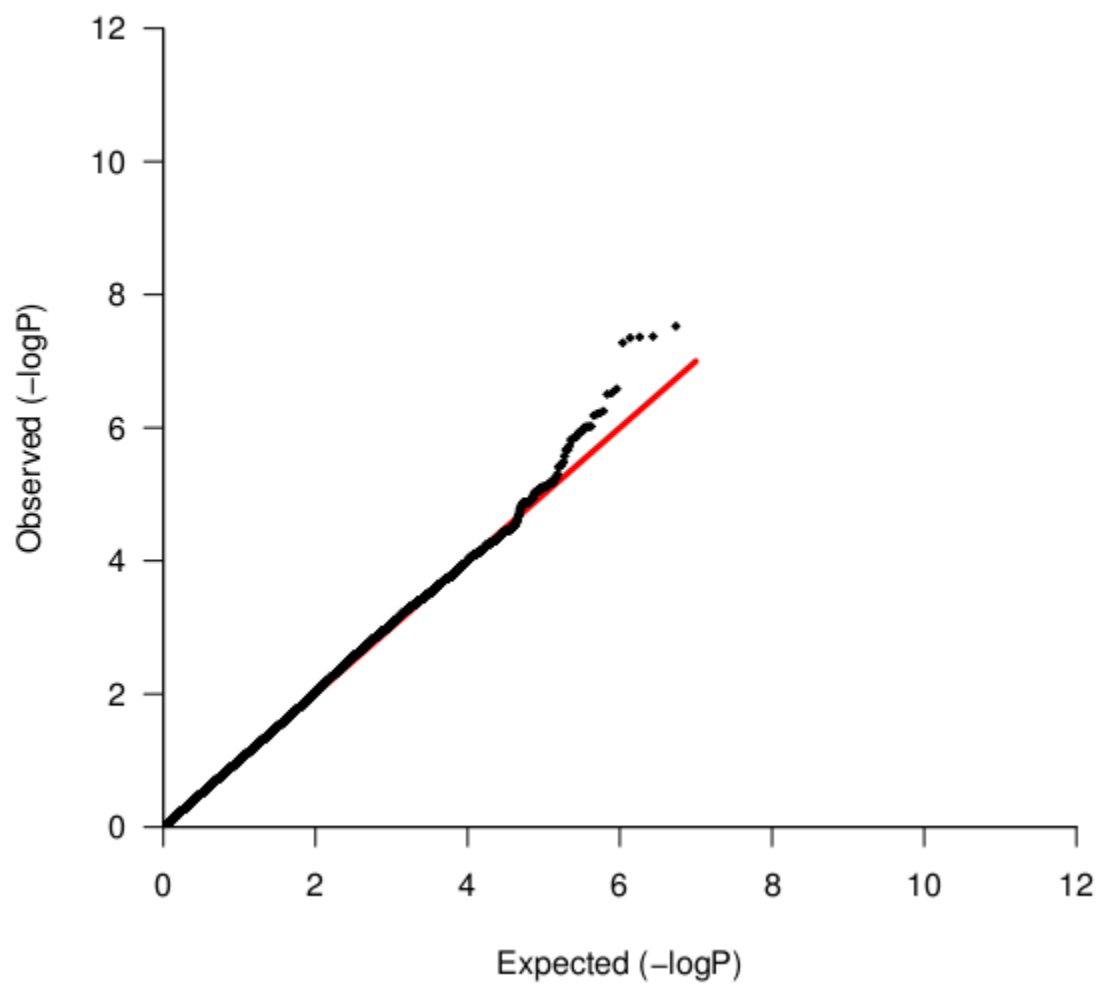

(e)

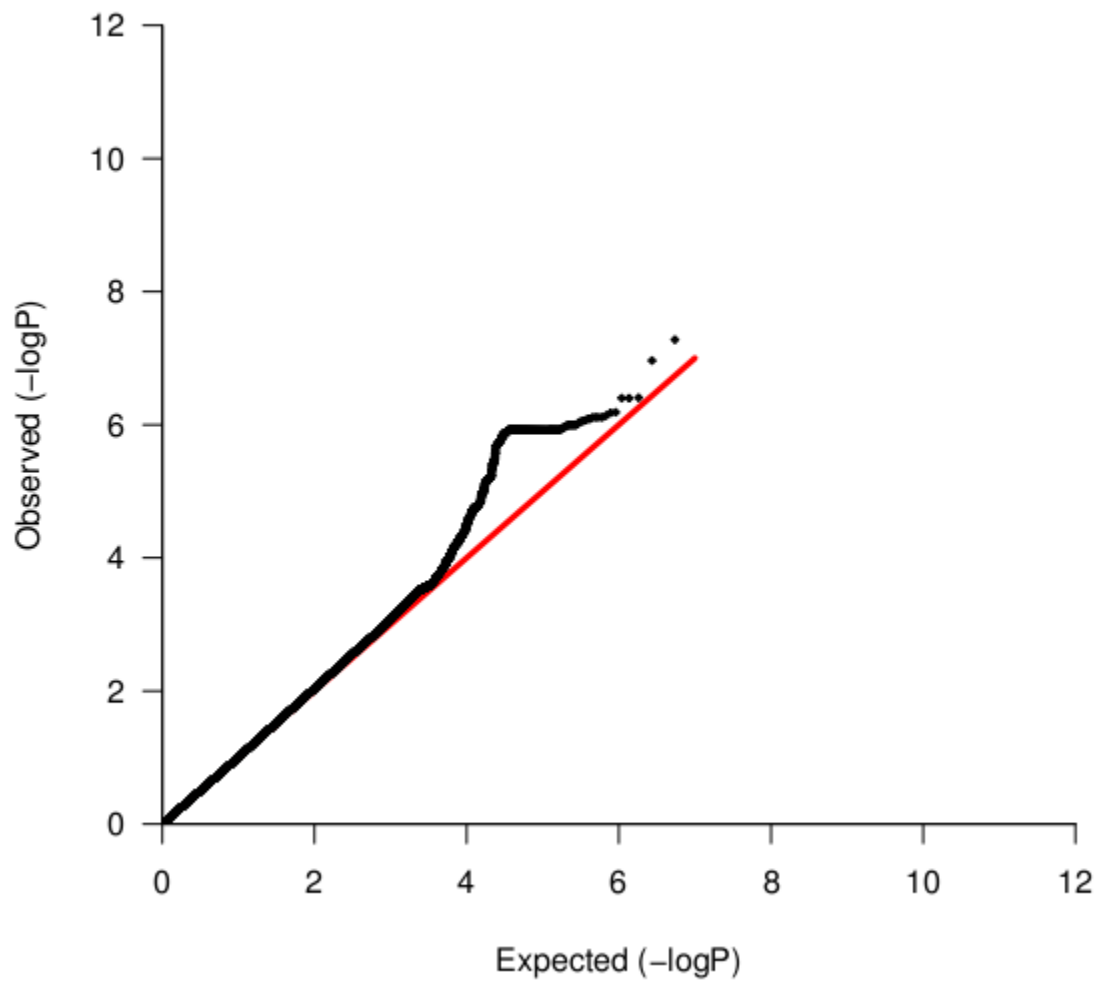

Supplement: fpc-27-7-s004.pdf [file fpc-27-7-s004.pdf]
