# Supplementary material for: Genome-wide association study of paliperidone efficacy
Source: PubMed Central journal article supplement — Pharmacogenet Genomics. 2016 Nov 11;27(1):7–18. doi: 10.1097/FPC.0000000000000250 (PMC5152628; doi:10.1097/fpc.0000000000000250), 2016-11-11
Supplement: fpc-27-7-s005.pdf [file fpc-27-7-s005.pdf]

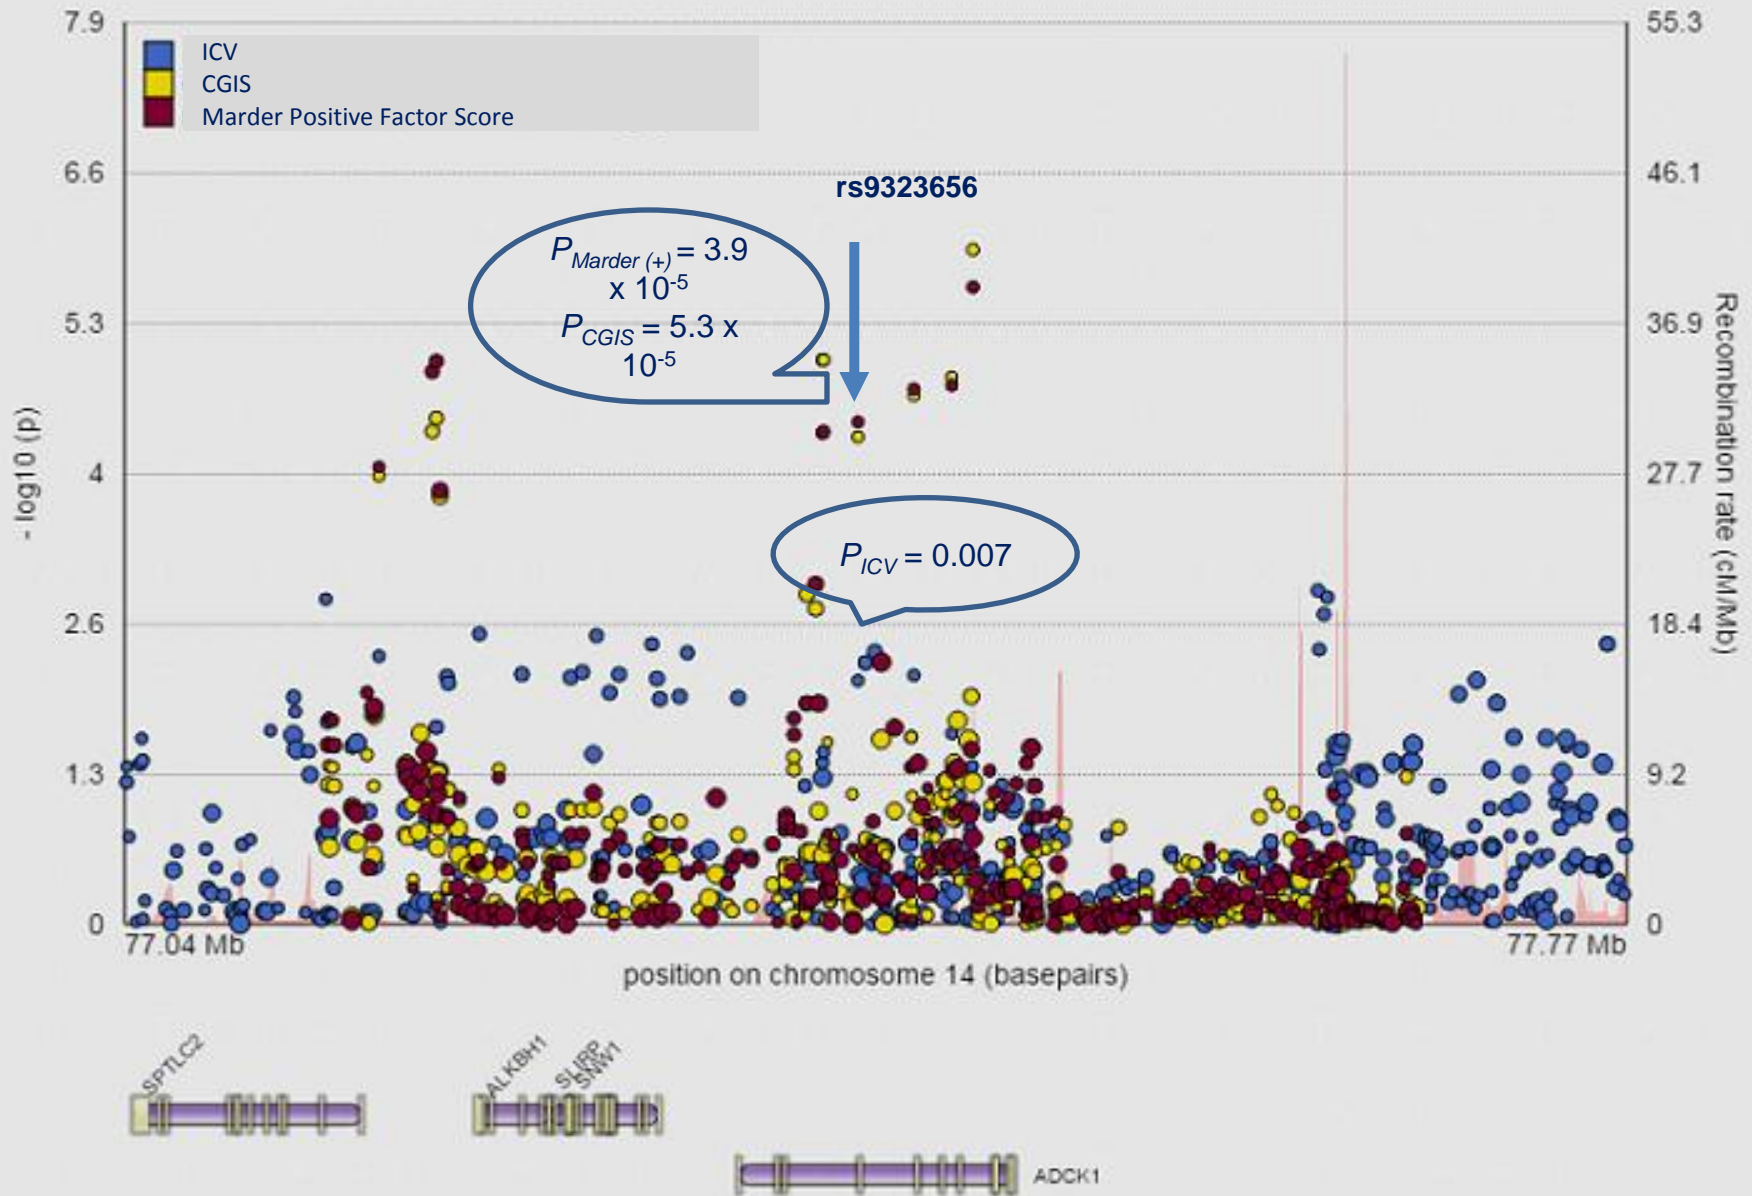

Figure 5 the association statistics for ADCK5 region was visualized using EnigmaVis. The ICV results were based on ICV in all normal subjects from <http://enigma.ini.usc.edu/enigma-vis/>.
