# Supplementary material for: Genome-wide association study of paliperidone efficacy
Source: PubMed Central journal article supplement — Pharmacogenet Genomics. 2016 Nov 11;27(1):7–18. doi: 10.1097/FPC.0000000000000250 (PMC5152628; doi:10.1097/fpc.0000000000000250), 2016-11-11
Supplement: fpc-27-7-s014.pdf [file fpc-27-7-s014.pdf]

**SDC Text 1** Haplotype based CGI-S association of markers from ADCK1 region using directly genotyped markers

SNPs from ADCK1 regions directly tiled on Illumina 1MDuo and PsychArray (surrounding rs56240334 and rs10147707, Table S1) are used to phase haplotype for CGI-S analysis. A haplotype sliding window approach was used for each of the three cohorts (Table S2, S3, and S4). The haplotype association was performed using PLINK v1.07.

Table S1 the list of Markers directly genotyped in Illumina 1MDuo and PsychArray used for the haplotype analysis. SNP directly genotyped are represented by X, while SNP not tiled on the genotyping platform was marked by “-“. The two SNPs highlighted in the paper are bolded.

| CHR       | SNP               |          | POS             | A1       | A2       | 1M       | PsychArray |
|-----------|-------------------|----------|-----------------|----------|----------|----------|------------|
| 14        | rs2364747         | 0        | 78368390        | A        | G        | X        | X          |
| 14        | rs12433276        | 0        | 78368610        | G        | A        | X        | -          |
| 14        | rs11623841        | 0        | 78370261        | C        | T        | X        | -          |
| 14        | rs8017520         | 0        | 78370882        | T        | C        | X        | -          |
| 14        | rs10140793        | 0        | 78371389        | C        | T        | X        | -          |
| <b>14</b> | <b>rs56240334</b> | <b>0</b> | <b>78371403</b> | <b>A</b> | <b>G</b> | -        | -          |
| 14        | rs17094040        | 0        | 78371946        | T        | C        | X        | -          |
| 14        | rs13379143        | 0        | 78373092        | G        | A        | X        | -          |
| 14        | rs6574411         | 0        | 78374327        | A        | G        | X        | -          |
| 14        | rs2364748         | 0        | 78378375        | C        | A        | X        | -          |
| 14        | rs1549118         | 0        | 78379684        | T        | C        | X        | -          |
| 14        | rs4533193         | 0        | 78380168        | T        | C        | X        | -          |
| 14        | rs8015618         | 0        | 78380390        | G        | A        | X        | X          |
| <b>14</b> | <b>rs10147707</b> | <b>0</b> | <b>78380555</b> | <b>T</b> | <b>C</b> | <b>X</b> | -          |

|    |            |   |          |   |   |   |   |
|----|------------|---|----------|---|---|---|---|
| 14 | rs8006523  | 0 | 78382375 | C | A | X | - |
| 14 | rs11628968 | 0 | 78388706 | G | A | X | - |
| 14 | rs7144239  | 0 | 78389173 | T | G | X | X |
| 14 | rs17106616 | 0 | 78390060 | A | G | - | X |
| 14 | rs2302944  | 0 | 78390880 | C | T | X | - |
| 14 | rs11850022 | 0 | 78392008 | T | C | X | - |
| 14 | rs7152398  | 0 | 78392555 | T | G | - | X |
| 14 | rs7141578  | 0 | 78394473 | A | G | X | - |
| 14 | rs3783952  | 0 | 78397193 | A | G | X | - |
| 14 | rs2287652  | 0 | 78397448 | G | A | X | - |
| 14 | rs2287653  | 0 | 78397627 | T | C | X | - |
| 14 | rs10438027 | 0 | 78398317 | T | C | X | - |
| 14 | rs11159309 | 0 | 78398891 | T | C | X | X |
| 14 | rs3087972  | 0 | 78399867 | C | T | X | X |

Table S2 in Cohort 1, the directly genotyped marker rs10147707 is highlighted in blue and the alleles making up the haplotype are aligned vertically (2 SNPs not directly genotyped in 1M are represented by dot (.) in the haplotype sequence. Only haplotype markers with CGI-S association p-value than less 0.001 are shown.

| NSNP | NHAP | CHR | BP1      | BP2      | SNP1       | SNP2       | HAPLOTYPE | F      | BETA   | STAT | P        |
|------|------|-----|----------|----------|------------|------------|-----------|--------|--------|------|----------|
| 1    | 2    | 14  | 78380555 | 78380555 | rs10147707 | rs10147707 | T         | 0.0916 | 0.405  | 12.7 | 0.000405 |
| 1    | 2    | 14  | 78380555 | 78380555 | rs10147707 | rs10147707 | C         | 0.908  | -0.405 | 12.7 | 0.000405 |
| 2    | 3    | 14  | 78380390 | 78380555 | rs8015618  | rs10147707 | AT        | 0.0917 | 0.41   | 13   | 0.000339 |
| 3    | 4    | 14  | 78380168 | 78380555 | rs4533193  | rs10147707 | CAT       | 0.0916 | 0.405  | 12.7 | 0.000405 |

|    |    |    |          |          |            |            |                     |        |       |      |          |
|----|----|----|----------|----------|------------|------------|---------------------|--------|-------|------|----------|
| 4  | 5  | 14 | 78379684 | 78380555 | rs1549118  | rs10147707 | TCAT                | 0.0916 | 0.405 | 12.7 | 0.000405 |
| 5  | 6  | 14 | 78378375 | 78380555 | rs2364748  | rs10147707 | CTCAT               | 0.0916 | 0.405 | 12.7 | 0.000405 |
| 6  | 6  | 14 | 78374327 | 78380555 | rs6574411  | rs10147707 | GTCAT               | 0.0916 | 0.405 | 12.7 | 0.000405 |
| 6  | 10 | 14 | 78378375 | 78382375 | rs2364748  | rs8006523  | CTCATA              | 0.0458 | 0.6   | 12.6 | 0.000416 |
| 7  | 6  | 14 | 78373092 | 78380555 | rs13379143 | rs10147707 | GGTCAT              | 0.0916 | 0.405 | 12.7 | 0.000405 |
| 8  | 6  | 14 | 78371946 | 78380555 | rs17094040 | rs10147707 | CGGTCAT             | 0.0916 | 0.405 | 12.7 | 0.000405 |
| 9  | 9  | 14 | 78371389 | 78380555 | rs10140793 | rs10147707 | TCGGTCAT            | 0.084  | 0.455 | 14.3 | 0.000178 |
| 10 | 10 | 14 | 78370882 | 78380555 | rs8017520  | rs10147707 | CTCGGTCAT           | 0.0834 | 0.456 | 14.5 | 0.000157 |
| 10 | 23 | 14 | 78374327 | 78390880 | rs6574411  | rs2302944  | GCTCATAAT.T         | 0.0105 | 1.15  | 13.9 | 0.00022  |
| 11 | 15 | 14 | 78370882 | 78382375 | rs8017520  | rs8006523  | CTCGGCTCATA         | 0.0484 | 0.555 | 11.8 | 0.000644 |
| 11 | 24 | 14 | 78374327 | 78392008 | rs6574411  | rs11850022 | GCTCATAAT.TC        | 0.0105 | 1.16  | 14   | 0.000205 |
| 12 | 15 | 14 | 78370882 | 78388706 | rs8017520  | rs11628968 | CTCGGCTCATAA        | 0.0485 | 0.546 | 12.1 | 0.00056  |
| 12 | 26 | 14 | 78374327 | 78394473 | rs6574411  | rs7141578  | GCTCATAAT.TC.A      | 0.0103 | 1.16  | 14   | 0.000206 |
| 13 | 26 | 14 | 78374327 | 78397193 | rs6574411  | rs3783952  | GCTCATAAT.TC.AA     | 0.0103 | 1.15  | 13.9 | 0.000212 |
| 14 | 28 | 14 | 78374327 | 78397448 | rs6574411  | rs2287652  | GCTCATAAT.TC.AAA    | 0.0103 | 1.15  | 13.9 | 0.000212 |
| 15 | 28 | 14 | 78374327 | 78397627 | rs6574411  | rs2287653  | GCTCATAAT.TC.AAAC   | 0.0103 | 1.15  | 13.9 | 0.000216 |
| 16 | 25 | 14 | 78374327 | 78398317 | rs6574411  | rs10438027 | GCTCATAAT.TC.AAACC  | 0.0103 | 1.15  | 13.9 | 0.000214 |
| 17 | 25 | 14 | 78374327 | 78398891 | rs6574411  | rs11159309 | GCTCATAAT.TC.AAACCC | 0.0103 | 1.15  | 13.9 | 0.000214 |
| 18 | 25 | 14 | 78374327 | 78399867 | rs6574411  | rs3087972  | GCTCATAAT.TC.AAACCT | 0.0103 | 1.15  | 13.9 | 0.000214 |

Table S3 in Cohort 2, the directly genotyped marker rs10147707 is highlighted in blue and the alleles making up the haplotype are aligned vertically (2 SNPs not directly genotyped in 1M are represented by dot (.) in the haplotype sequence. Only haplotype markers with CGI-S association p-value than less 0.001 are shown.

| NSNP | NHAP | CHR | BP1      | BP2      | SNP1       | SNP2       | HAPLOTYPE | F      | BETA  | STAT | P        |
|------|------|-----|----------|----------|------------|------------|-----------|--------|-------|------|----------|
| 5    | 9    | 14  | 78380555 | 78390880 | rs10147707 | rs2302944  | TAAG.T    | 0.0222 | 0.869 | 11.5 | 0.000753 |
| 6    | 11   | 14  | 78380555 | 78392008 | rs10147707 | rs11850022 | TAAG.TC   | 0.0184 | 0.839 | 11   | 0.000995 |

|    |    |    |          |          |            |            |                   |        |       |      |          |
|----|----|----|----------|----------|------------|------------|-------------------|--------|-------|------|----------|
| 10 | 10 | 14 | 78370882 | 78380555 | rs8017520  | rs10147707 | CTCGGCTCAT        | 0.0834 | 0.378 | 11.5 | 0.000761 |
| 11 | 15 | 14 | 78370882 | 78382375 | rs8017520  | rs8006523  | CTCGGCTCATA       | 0.0484 | 0.503 | 11.2 | 0.000891 |
| 11 | 20 | 14 | 78373092 | 78390880 | rs13379143 | rs2302944  | GGCTCATTAAG.T     | 0.0276 | 0.727 | 12.6 | 0.000409 |
| 11 | 13 | 14 | 78380555 | 78398317 | rs10147707 | rs10438027 | TAAG.TC.GGACT     | 0.0174 | 0.813 | 11.3 | 0.000821 |
| 12 | 18 | 14 | 78371946 | 78390880 | rs17094040 | rs2302944  | CGGCTCATTAAG.T    | 0.0188 | 0.894 | 12   | 0.000569 |
| 12 | 19 | 14 | 78373092 | 78392008 | rs13379143 | rs11850022 | GGCTCATTAAG.TC    | 0.024  | 0.734 | 12   | 0.00057  |
| 12 | 15 | 14 | 78380390 | 78398317 | rs8015618  | rs10438027 | ATAAG.TC.GGACT    | 0.0171 | 0.849 | 12.1 | 0.000551 |
| 12 | 13 | 14 | 78380555 | 78398891 | rs10147707 | rs11159309 | TAAG.TC.GGACTC    | 0.0174 | 0.813 | 11.3 | 0.00082  |
| 13 | 19 | 14 | 78371389 | 78390880 | rs10140793 | rs2302944  | TCGGCTCATTAAG.T   | 0.0156 | 1.1   | 15.5 | 9.48e-05 |
| 13 | 21 | 14 | 78371946 | 78392008 | rs17094040 | rs11850022 | CGGCTCATTAAG.TC   | 0.0164 | 0.879 | 11.5 | 0.000749 |
| 3  | 6  | 14 | 78371389 | 78373092 | rs10140793 | rs13379143 | TCG               | 0.157  | 0.298 | 11.2 | 0.000868 |
| 4  | 8  | 14 | 78370882 | 78373092 | rs8017520  | rs13379143 | TCG               | 0.157  | 0.301 | 11.6 | 0.000722 |
| 4  | 6  | 14 | 78371389 | 78374327 | rs10140793 | rs6574411  | TCGG              | 0.156  | 0.296 | 11.1 | 0.00091  |
| 5  | 8  | 14 | 78370882 | 78374327 | rs8017520  | rs6574411  | CTCGG             | 0.156  | 0.299 | 11.4 | 0.000774 |
| 5  | 7  | 14 | 78371389 | 78378375 | rs10140793 | rs2364748  | TCGGC             | 0.154  | 0.297 | 11.2 | 0.000876 |
| 13 | 20 | 14 | 78373092 | 78394473 | rs13379143 | rs7141578  | GGCTCATTAAG.TC.G  | 0.0233 | 0.73  | 12.2 | 0.000518 |
| 13 | 18 | 14 | 78380168 | 78398317 | rs4533193  | rs10438027 | CATAAG.TC.GGACT   | 0.0169 | 0.856 | 12.1 | 0.000558 |
| 13 | 15 | 14 | 78380390 | 78398891 | rs8015618  | rs11159309 | ATAAG.TC.GGACTC   | 0.0171 | 0.849 | 12.1 | 0.000551 |
| 13 | 13 | 14 | 78380555 | 78399867 | rs10147707 | rs3087972  | TAAG.TC.GGACTCC   | 0.0174 | 0.813 | 11.3 | 0.00082  |
| 14 | 22 | 14 | 78370882 | 78390880 | rs8017520  | rs2302944  | CTCGGCTCATTAAG.T  | 0.0248 | 0.808 | 14.7 | 0.000138 |
| 14 | 21 | 14 | 78371389 | 78392008 | rs10140793 | rs11850022 | TCGGCTCATTAAG.TC  | 0.0132 | 1.14  | 15.2 | 0.000107 |
| 14 | 20 | 14 | 78373092 | 78397193 | rs13379143 | rs3783952  | GGCTCATTAAG.TC.GG | 0.0233 | 0.731 | 12.2 | 0.000514 |
| 14 | 21 | 14 | 78379684 | 78398317 | rs1549118  | rs10438027 | TCATAAG.TC.GGACT  | 0.0173 | 0.836 | 12   | 0.000587 |
| 14 | 18 | 14 | 78380168 | 78398891 | rs4533193  | rs11159309 | CATAAG.TC.GGACTC  | 0.017  | 0.855 | 12.1 | 0.000559 |
| 14 | 15 | 14 | 78380390 | 78399867 | rs8015618  | rs3087972  | ATAAG.TC.GGACTCC  | 0.0171 | 0.849 | 12.1 | 0.000551 |

|    |    |    |          |          |            |            |                       |        |       |      |          |
|----|----|----|----------|----------|------------|------------|-----------------------|--------|-------|------|----------|
| 15 | 23 | 14 | 78370882 | 78392008 | rs8017520  | rs11850022 | CTCGGCTCATAAG.TC      | 0.0216 | 0.832 | 14.2 | 0.000183 |
| 15 | 22 | 14 | 78371389 | 78394473 | rs10140793 | rs7141578  | TCGGCTCATAAG.TC.G     | 0.0139 | 1.01  | 14.9 | 0.000127 |
| 15 | 21 | 14 | 78373092 | 78397448 | rs13379143 | rs2287652  | GGCTCATAAG.TC.GGA     | 0.0232 | 0.737 | 12.4 | 0.000476 |
| 15 | 21 | 14 | 78379684 | 78398891 | rs1549118  | rs11159309 | TCATAAG.TC.GGACTC     | 0.0173 | 0.836 | 12   | 0.000585 |
| 15 | 18 | 14 | 78380168 | 78399867 | rs4533193  | rs3087972  | CATAAG.TC.GGACTCC     | 0.017  | 0.855 | 12.1 | 0.000559 |
| 16 | 16 | 14 | 78368610 | 78390880 | rs12433276 | rs2302944  | ACCTCGGCTCATAAG.T     | 0.015  | 0.958 | 11.3 | 0.00081  |
| 16 | 22 | 14 | 78370882 | 78394473 | rs8017520  | rs7141578  | CTCGGCTCATAAG.TC.G    | 0.0213 | 0.824 | 14.2 | 0.000179 |
| 16 | 22 | 14 | 78371389 | 78397193 | rs10140793 | rs3783952  | TCGGCTCATAAG.TC.GG    | 0.0139 | 1.01  | 14.9 | 0.000127 |
| 16 | 21 | 14 | 78371946 | 78397448 | rs17094040 | rs2287652  | CGGCTCATAAG.TC.GGA    | 0.0168 | 0.801 | 11   | 0.000975 |
| 16 | 21 | 14 | 78373092 | 78397627 | rs13379143 | rs2287653  | GGCTCATAAG.TC.GGAC    | 0.0233 | 0.737 | 12.4 | 0.000466 |
| 16 | 21 | 14 | 78379684 | 78399867 | rs1549118  | rs3087972  | TCATAAG.TC.GGACTCC    | 0.0173 | 0.836 | 12   | 0.000585 |
| 17 | 17 | 14 | 78368610 | 78392008 | rs12433276 | rs11850022 | ACCTCGGCTCATAAG.TC    | 0.015  | 0.985 | 13.2 | 0.000314 |
| 17 | 22 | 14 | 78370882 | 78397193 | rs8017520  | rs3783952  | CTCGGCTCATAAG.TC.GG   | 0.0214 | 0.826 | 14.4 | 0.000165 |
| 17 | 21 | 14 | 78371389 | 78397448 | rs10140793 | rs2287652  | TCGGCTCATAAG.TC.GGA   | 0.0138 | 0.995 | 14.8 | 0.000137 |
| 17 | 21 | 14 | 78371946 | 78397627 | rs17094040 | rs2287653  | CGGCTCATAAG.TC.GGAC   | 0.0168 | 0.801 | 11.1 | 0.000945 |
| 17 | 20 | 14 | 78373092 | 78398317 | rs13379143 | rs10438027 | GGCTCATAAG.TC.GGACT   | 0.0181 | 0.862 | 12.8 | 0.000381 |
| 18 | 17 | 14 | 78368610 | 78394473 | rs12433276 | rs7141578  | ACCTCGGCTCATAAG.TC.G  | 0.0153 | 0.896 | 12   | 0.000561 |
| 18 | 21 | 14 | 78370882 | 78397448 | rs8017520  | rs2287652  | CTCGGCTCATAAG.TC.GGA  | 0.0213 | 0.824 | 14.4 | 0.000167 |
| 18 | 22 | 14 | 78371389 | 78397627 | rs10140793 | rs2287653  | TCGGCTCATAAG.TC.GGAC  | 0.0138 | 0.993 | 14.8 | 0.000137 |
| 18 | 21 | 14 | 78371946 | 78398317 | rs17094040 | rs10438027 | CGGCTCATAAG.TC.GGACT  | 0.0155 | 0.972 | 14.8 | 0.000136 |
| 18 | 20 | 14 | 78373092 | 78398891 | rs13379143 | rs11159309 | GGCTCATAAG.TC.GGACTC  | 0.0181 | 0.862 | 12.8 | 0.000381 |
| 19 | 17 | 14 | 78368610 | 78397193 | rs12433276 | rs3783952  | ACCTCGGCTCATAAG.TC.GG | 0.0153 | 0.896 | 12   | 0.000561 |
| 19 | 21 | 14 | 78370882 | 78397627 | rs8017520  | rs2287653  | CTCGGCTCATAAG.TC.GGAC | 0.0213 | 0.824 | 14.4 | 0.000164 |
| 19 | 22 | 14 | 78371389 | 78398317 | rs10140793 | rs10438027 | TCGGCTCATAAG.TC.GGACT | 0.0132 | 0.976 | 14.5 | 0.000153 |
| 19 | 21 | 14 | 78371946 | 78398891 | rs17094040 | rs11159309 | CGGCTCATAAG.TC.GGACTC | 0.0155 | 0.972 | 14.8 | 0.000136 |

|    |    |    |          |          |            |            |             |   |                |        |       |      |          |
|----|----|----|----------|----------|------------|------------|-------------|---|----------------|--------|-------|------|----------|
| 19 | 20 | 14 | 78373092 | 78399867 | rs13379143 | rs3087972  | GGCTCA      | T | AAG.TC.GGACTCC | 0.0181 | 0.862 | 12.8 | 0.000381 |
| 20 | 18 | 14 | 78368610 | 78397448 | rs12433276 | rs2287652  | ACCTCGGCTCA | T | AAG.TC.GGA     | 0.0153 | 0.894 | 12   | 0.000564 |
| 20 | 22 | 14 | 78371389 | 78398891 | rs10140793 | rs11159309 | TCGGCTCA    | T | AAG.TC.GGACTC  | 0.0132 | 0.976 | 14.5 | 0.000153 |
| 20 | 21 | 14 | 78371946 | 78399867 | rs17094040 | rs3087972  | CGGCTCA     | T | AAG.TC.GGACTCC | 0.0155 | 0.972 | 14.8 | 0.000136 |
| 21 | 18 | 14 | 78368610 | 78397627 | rs12433276 | rs2287653  | ACCTCGGCTCA | T | AAG.TC.GGAC    | 0.0154 | 0.891 | 12   | 0.000576 |
| 21 | 22 | 14 | 78371389 | 78399867 | rs10140793 | rs3087972  | TCGGCTCA    | T | AAG.TC.GGACTCC | 0.0132 | 0.976 | 14.5 | 0.000153 |
| 22 | 17 | 14 | 78368610 | 78398317 | rs12433276 | rs10438027 | ACCTCGGCTCA | T | AAG.TC.GGACT   | 0.0138 | 0.901 | 11.6 | 0.000712 |
| 23 | 17 | 14 | 78368610 | 78398891 | rs12433276 | rs11159309 | ACCTCGGCTCA | T | AAG.TC.GGACTC  | 0.0138 | 0.901 | 11.6 | 0.000713 |
| 24 | 17 | 14 | 78368610 | 78399867 | rs12433276 | rs3087972  | ACCTCGGCTCA | T | AAG.TC.GGACTCC | 0.0138 | 0.901 | 11.6 | 0.000713 |

Table S4 in Cohort 3, the alleles making up the haplotype are aligned vertically (SNPs not directly genotyped in PsychArray are represented by dot (.) in the haplotype sequence. Only haplotype markers with CGI-S association p-value than less 0.001 are shown.

| SNP | NHAP | CHR | BP1      | BP2      | SNP1       | SNP2       | HAPLOTYPE             | F      | BETA   | STAT | P       |
|-----|------|-----|----------|----------|------------|------------|-----------------------|--------|--------|------|---------|
| 1   | 2    | 14  | 78398891 | 78398891 | rs11159309 | rs11159309 | T                     | 0.104  | 0.339  | 8.08 | 0.00475 |
| 1   | 2    | 14  | 78398891 | 78398891 | rs11159309 | rs11159309 | C                     | 0.896  | -0.339 | 8.08 | 0.00475 |
| 2   | 3    | 14  | 78392555 | 78398891 | rs7152398  | rs11159309 | G.....T               | 0.104  | 0.339  | 8.08 | 0.00475 |
| 2   | 3    | 14  | 78398891 | 78399867 | rs11159309 | rs3087972  | TC                    | 0.104  | 0.339  | 8.08 | 0.00475 |
| 3   | 4    | 14  | 78390060 | 78398891 | rs17106616 | rs11159309 | G..G.....T            | 0.104  | 0.34   | 8.14 | 0.00461 |
| 3   | 4    | 14  | 78392555 | 78399867 | rs7152398  | rs3087972  | G.....TC              | 0.104  | 0.34   | 8.14 | 0.00461 |
| 4   | 6    | 14  | 78389173 | 78398891 | rs7144239  | rs11159309 | GG..G.....T           | 0.0808 | 0.35   | 7.05 | 0.00829 |
| 4   | 5    | 14  | 78390060 | 78399867 | rs17106616 | rs3087972  | G..G.....TC           | 0.104  | 0.34   | 8.14 | 0.00461 |
| 5   | 7    | 14  | 78389173 | 78399867 | rs7144239  | rs3087972  | GG..G.....TC          | 0.0809 | 0.349  | 7.01 | 0.00847 |
| 6   | 15   | 14  | 78368390 | 78398891 | rs2364747  | rs11159309 | G.....A...GG..G.....T | 0.0191 | 0.81   | 6.96 | 0.0087  |
